# Supplementary material for: Auriferous alkynylselenolatoalkylidynes
Source: Royal Society of Chemistry journal article supplement (doi:10.1039/c9dt02314c), 2019-01-01
Supplement: c9dt02314c1.pdf [file c9dt02314c1.pdf]

Electronic Supporting information for:

Auriferous alkynylselenolatoalkylidynes

Benjamin J. Frogley,<sup>a</sup> Anthony F. Hill<sup>\*a</sup> and Chee S. Onn<sup>a</sup>

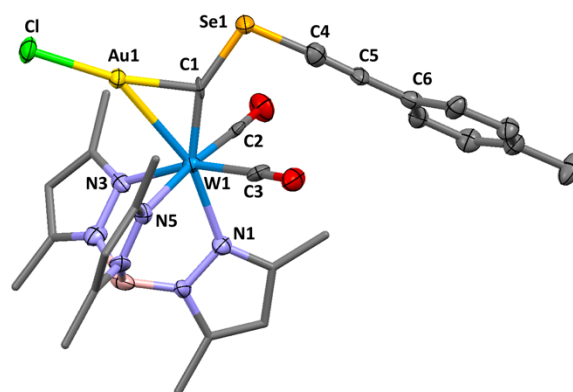

**Figure S1.** Molecular structure of **3d** in a crystal of **3d**·(CH<sub>2</sub>Cl<sub>2</sub>)<sub>0.5</sub> showing 50% thermal probability ellipsoids. Pyrazolyl groups are simplified and hydrogen atoms are not shown for clarity. Selected distances [Å] and angles [°]: W1–C1 1.902(13), W1–Au1 2.8174(7), C1–Au1 1.990(11), Au1–Cl1 2.278(3), C1–Se1 1.890(12), Se1–C4 1.858(15), C4–C5 1.186(19), C5–C21 1.425(19), W1–C1–Se1 151.4(7), W1–C1–Au1 92.7(5), C1–Se1–C4 99.3(6), Se1–C4–C5 176.9(13).

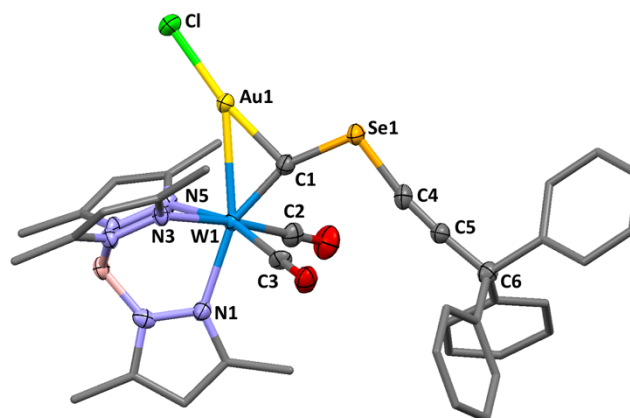

**Figure S2.** Molecular structure of **3f** showing 50% thermal probability ellipsoids. Pyrazolyl groups and phenyl rings are simplified and hydrogen atoms are not shown for clarity. Selected distances [Å] and angles [°]: W1–C1 1.884(7), W1–Au1 2.7784(4), C1–Au1 2.038(7), Au1–Cl1 2.2776(18), C1–Se1 1.876(7), Se1–C4 1.842(7), C4–C5 1.214(11), C5–C6 1.452(10), W1–C1–Se1 157.1(4), W1–C1–Au1 90.1(3), C1–Au1–Cl1 171.1(2), W1–Au1–Cl1 145.86(5), C1–Se1–C4 102.1(3), Se1–C4–C5 171.2(7), C4–C5–C6 175.1(8).

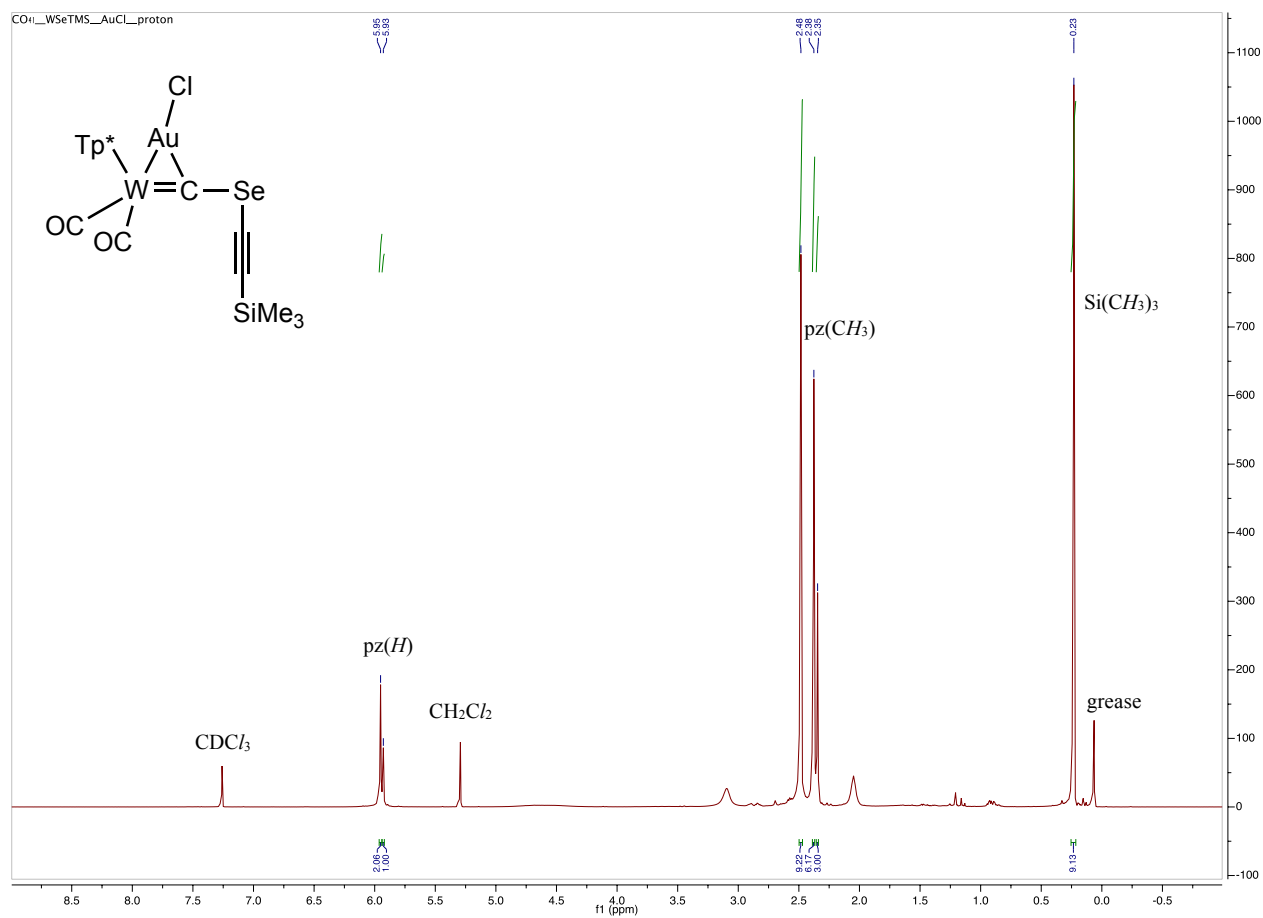

$^1\text{H}$  NMR SPECTRUM ( $600\text{ MHz}$ ,  $\text{CDCl}_3$ ,  $25^\circ\text{C}$ ,  $\delta$ ) of  $[\text{WAuCl}(\mu\text{-CSeC}\equiv\text{CSiMe}_3)(\text{CO})_2(\text{Tp}^*)]$  (**3a**).

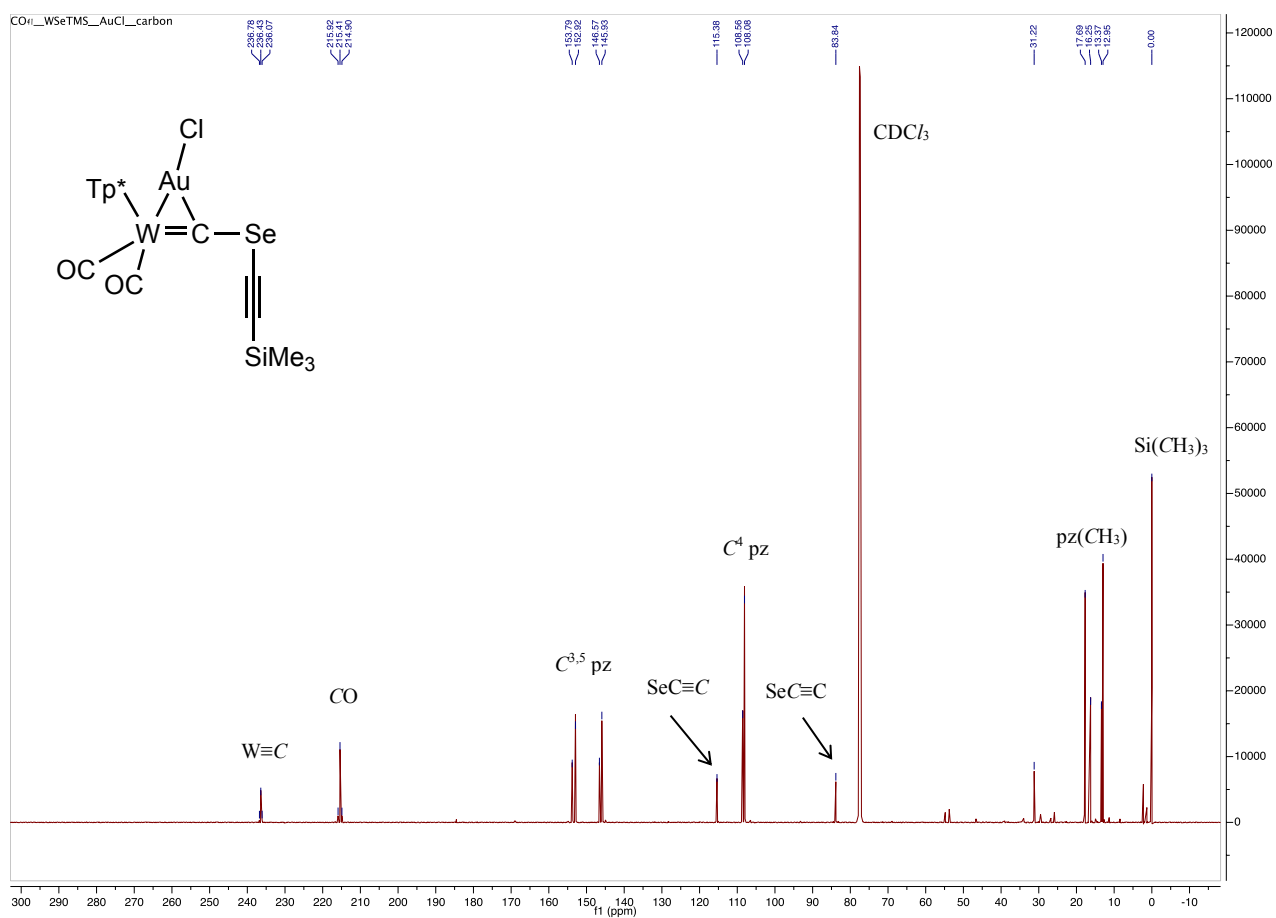

$^{13}\text{C}\{^1\text{H}\}$  NMR SPECTRUM (151 MHz,  $\text{CDCl}_3$ ,  $25^\circ\text{C}$ ,  $\delta$ ) of  $[\text{WAuCl}(\mu\text{-CSeC}\equiv\text{CSiMe}_3)(\text{CO})_2(\text{Tp}^*)]$  (**3a**).

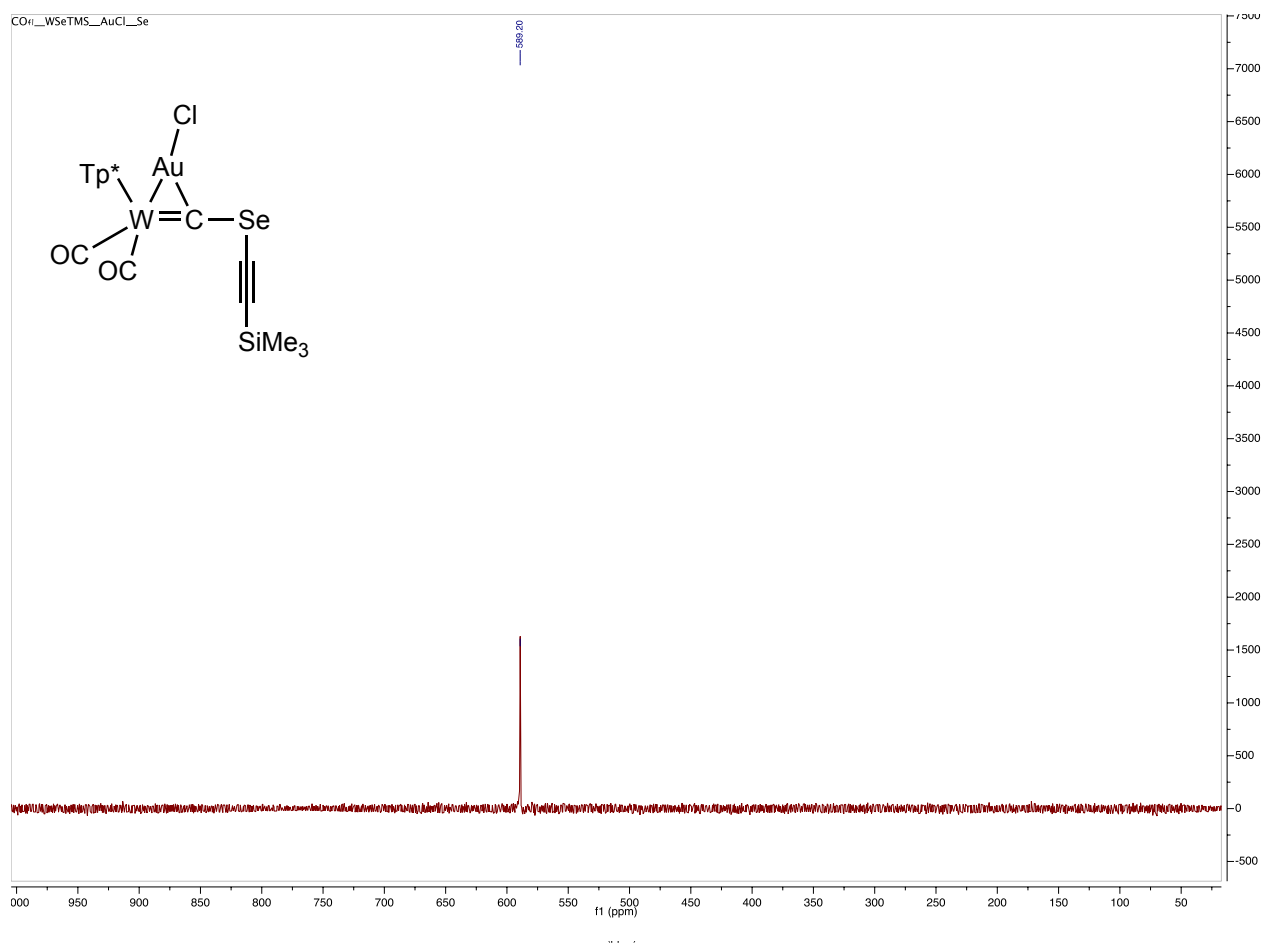

$^{77}\text{Se}\{^1\text{H}\}$  NMR SPECTRUM (76 MHz,  $\text{CDCl}_3$ , 25 °C,  $\delta$ ) of  $[WAuCl(\mu-CSeC\equiv CSiMe_3)(CO)_2(Tp^*)]$  (**3a**).

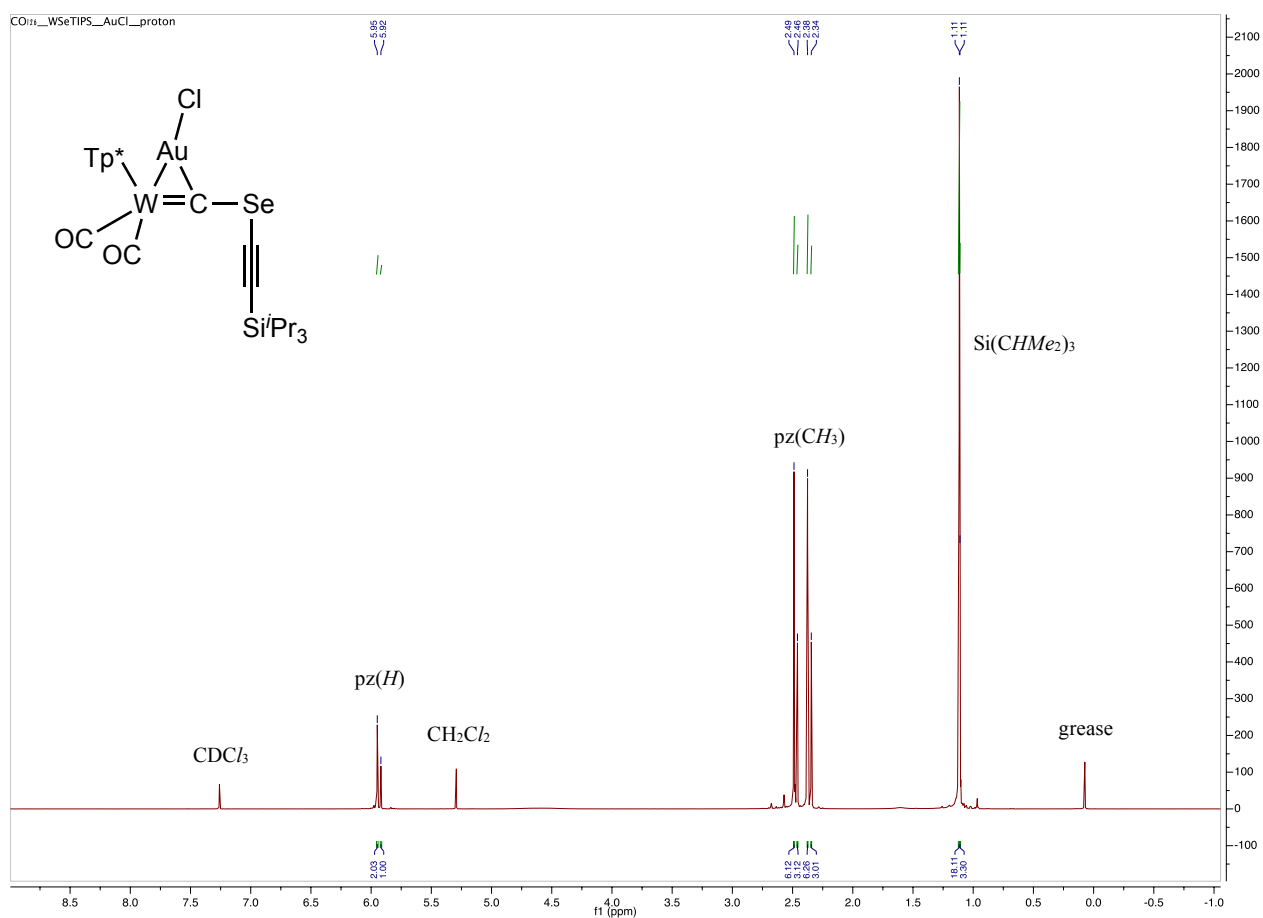

$^1\text{H}$  NMR SPECTRUM ( $700\text{ MHz}$ ,  $\text{CDCl}_3$ ,  $25^\circ\text{C}$ ,  $\delta$ ) of  $[\text{WAuCl}(\mu\text{-CSeC}\equiv\text{CSi}^i\text{Pr}_3)(\text{CO})_2(\text{Tp}^*)]$  (**3b**).

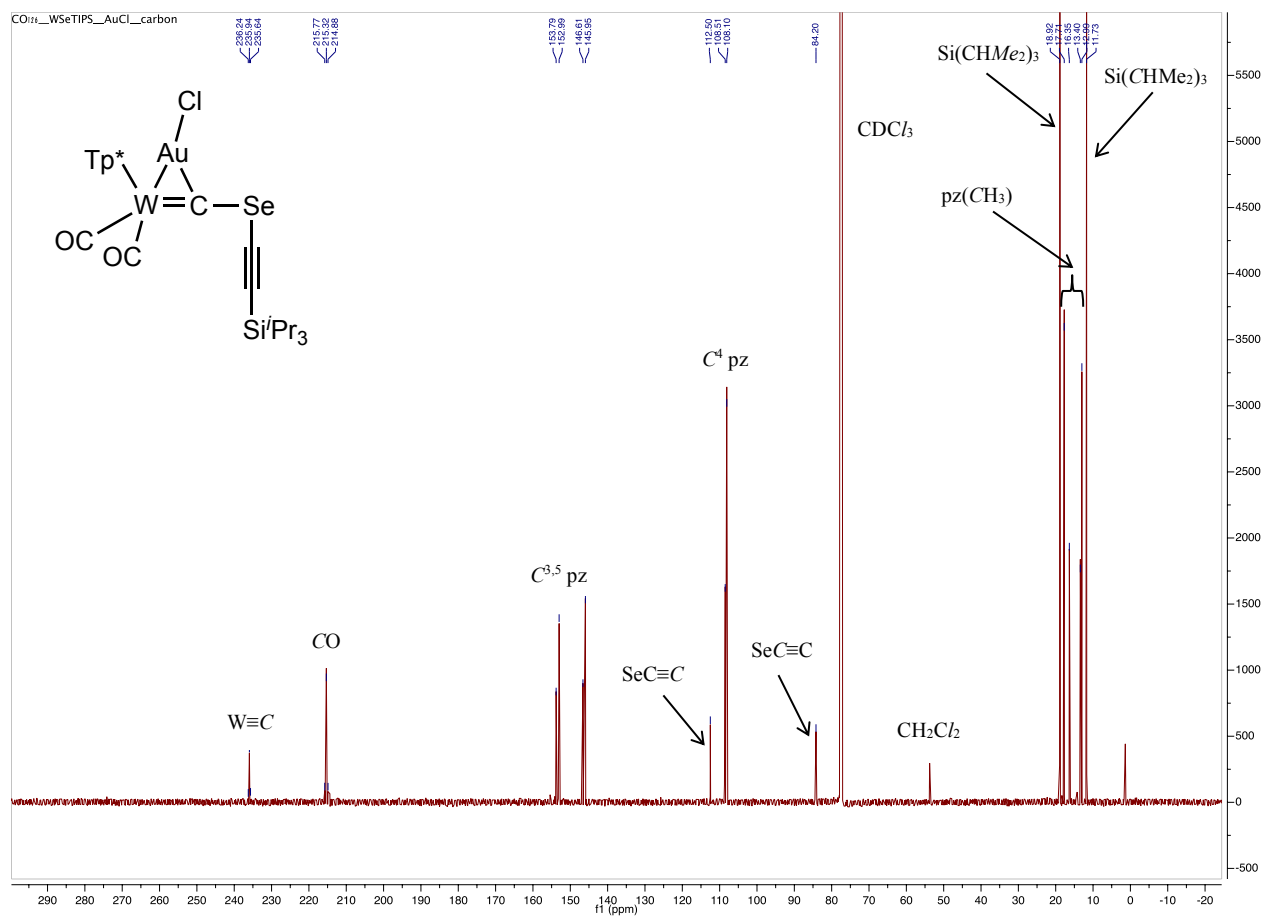

$^{13}\text{C}\{^1\text{H}\}$  NMR SPECTRUM (176 MHz,  $\text{CDCl}_3$ ,  $25^\circ\text{C}$ ,  $\delta$ ) of  $[\text{WAuCl}(\mu\text{-CSeC}\equiv\text{CSi}^i\text{Pr}_3)(\text{CO})_2(\text{Tp}^*)]$  (**3b**).

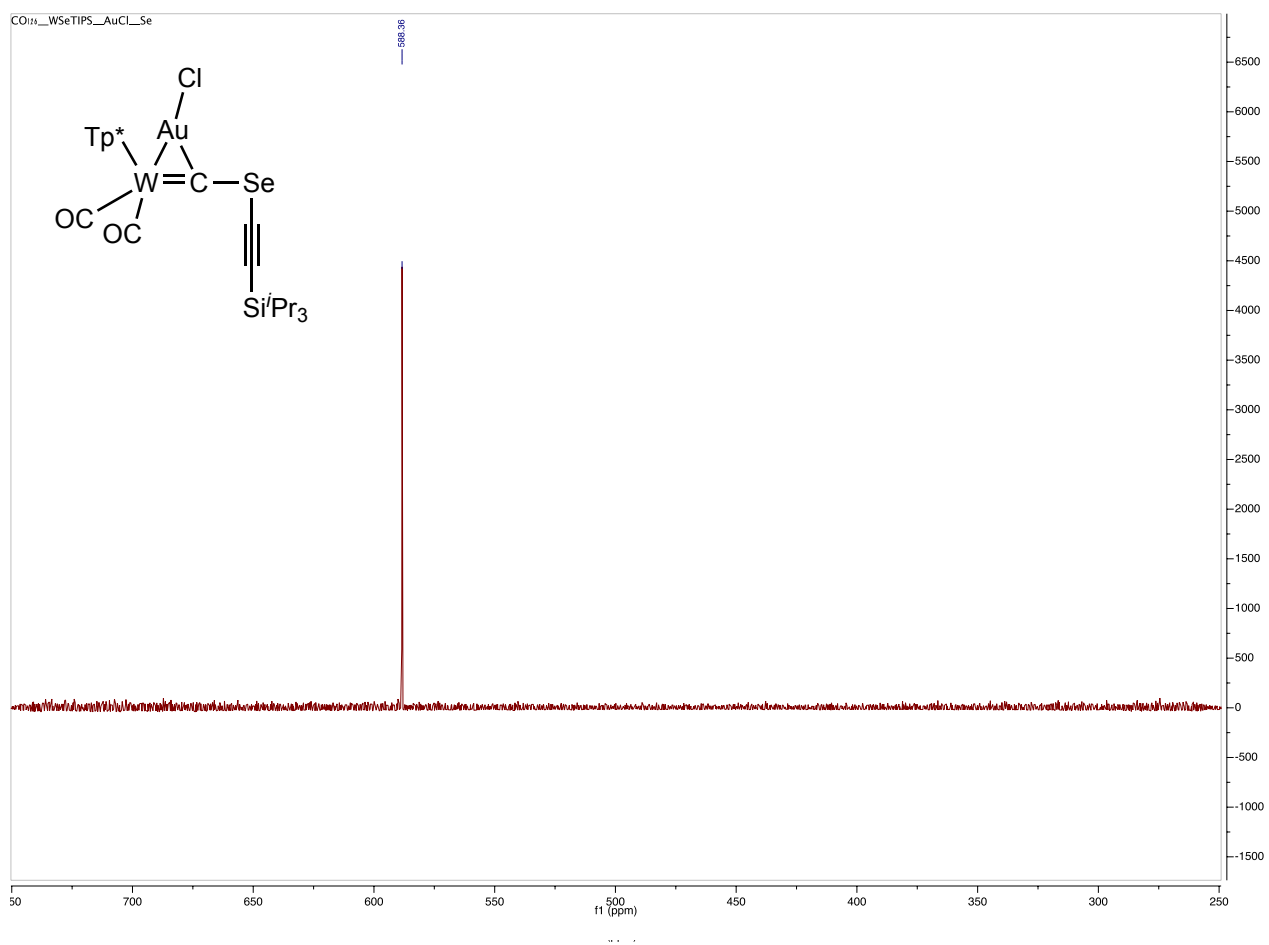

$^{77}\text{Se}\{^1\text{H}\}$  NMR SPECTRUM (76 MHz,  $\text{CDCl}_3$ ,  $25^\circ\text{C}$ ,  $\delta$ ) of  $[\text{WAuCl}(\mu\text{-CSeC}\equiv\text{CSi}^t\text{Pr}_3)(\text{CO})_2(\text{Tp}^*)]$  (**3b**).

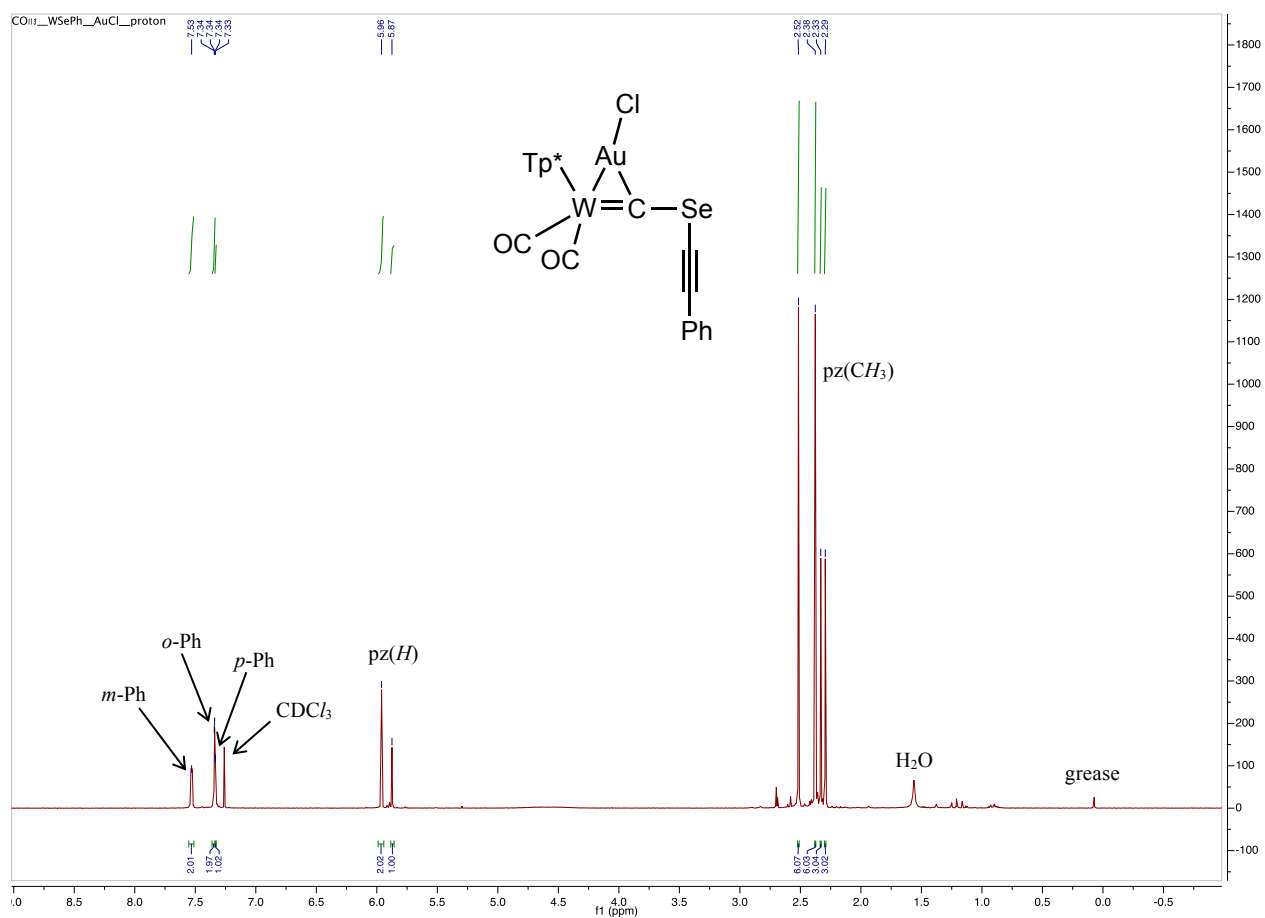

$^1\text{H}$  NMR SPECTRUM ( $700\text{ MHz}$ ,  $\text{CDCl}_3$ ,  $25^\circ\text{C}$ ,  $\delta$ ) of  $[\text{WAuCl}(\mu\text{-CSeC}\equiv\text{CPh})(\text{CO})_2(\text{Tp}^*)]$  (**3c**).



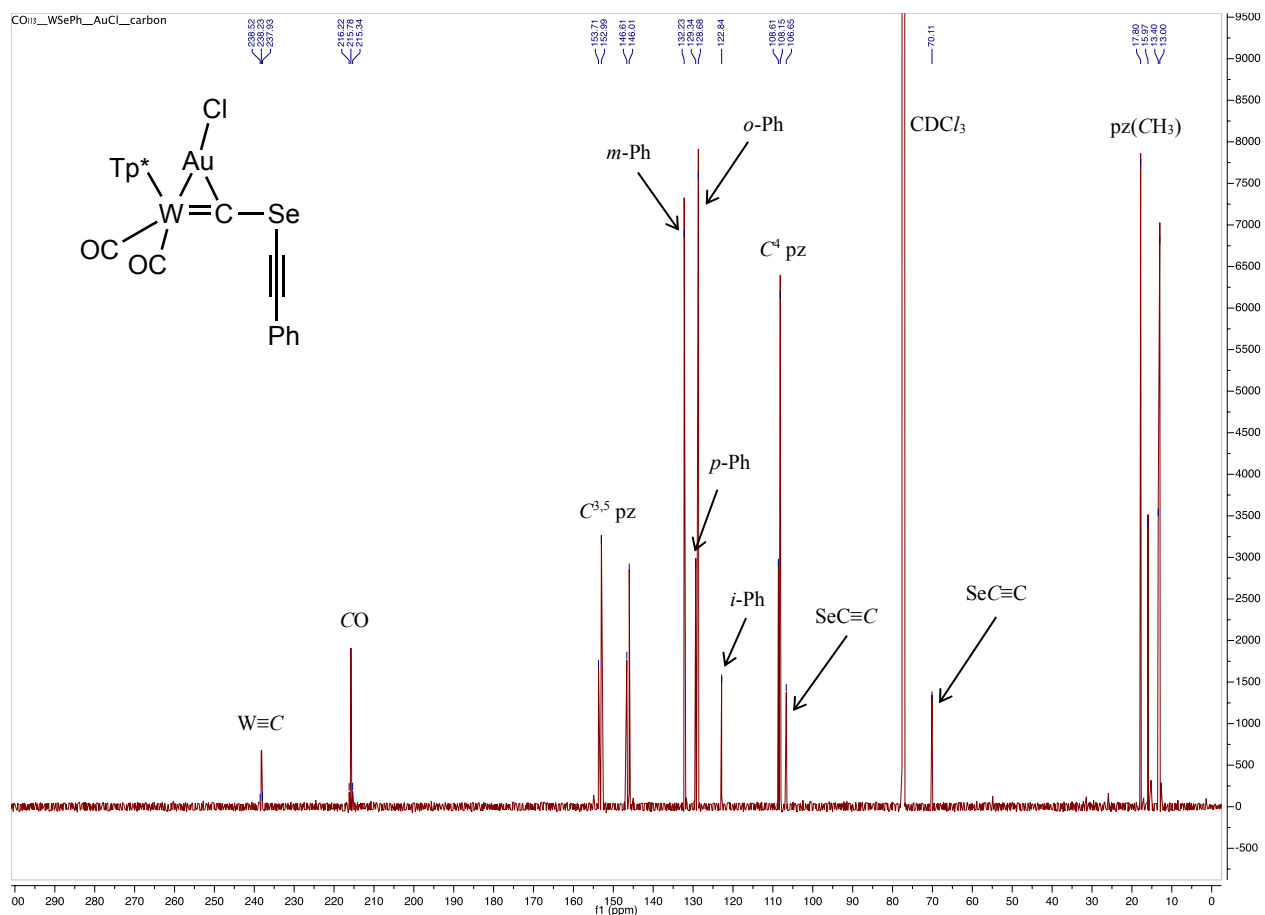

$^{13}C\{^1H\}$  NMR SPECTRUM (176 MHz,  $CDCl_3$ , 25°C,  $\delta$ ) of  $[WAuCl(\mu-CSeC\equiv CPh)(CO)_2(Tp^*)]$  (3c).

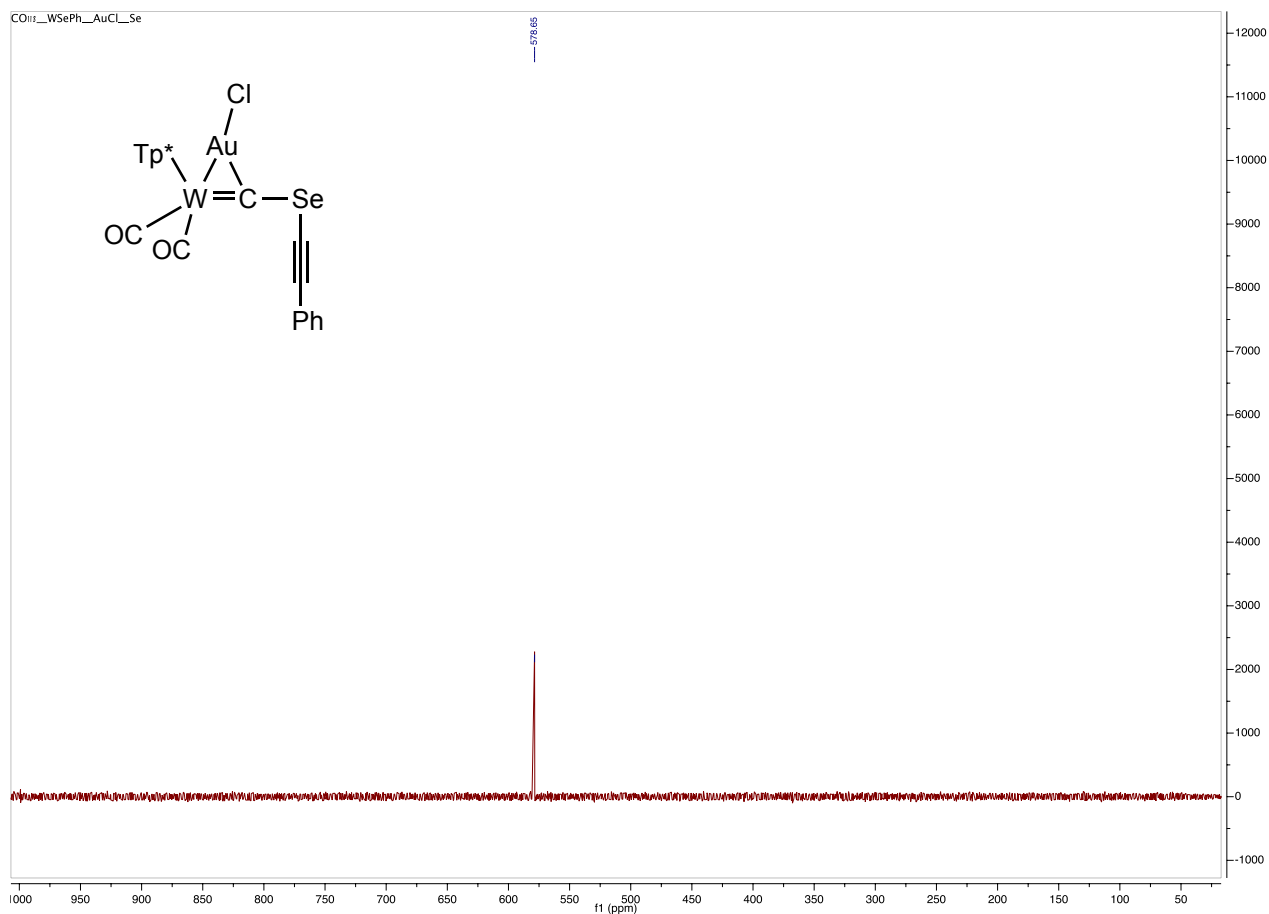

$^{77}\text{Se}\{^1\text{H}\}$  NMR SPECTRUM (76 MHz,  $\text{CDCl}_3$ ,  $25^\circ\text{C}$ ,  $\delta$ ) of  $[\text{WAuCl}(\mu\text{-CSeC}\equiv\text{CPh})(\text{CO})_2(\text{Tp}^*)]$  (**3c**).

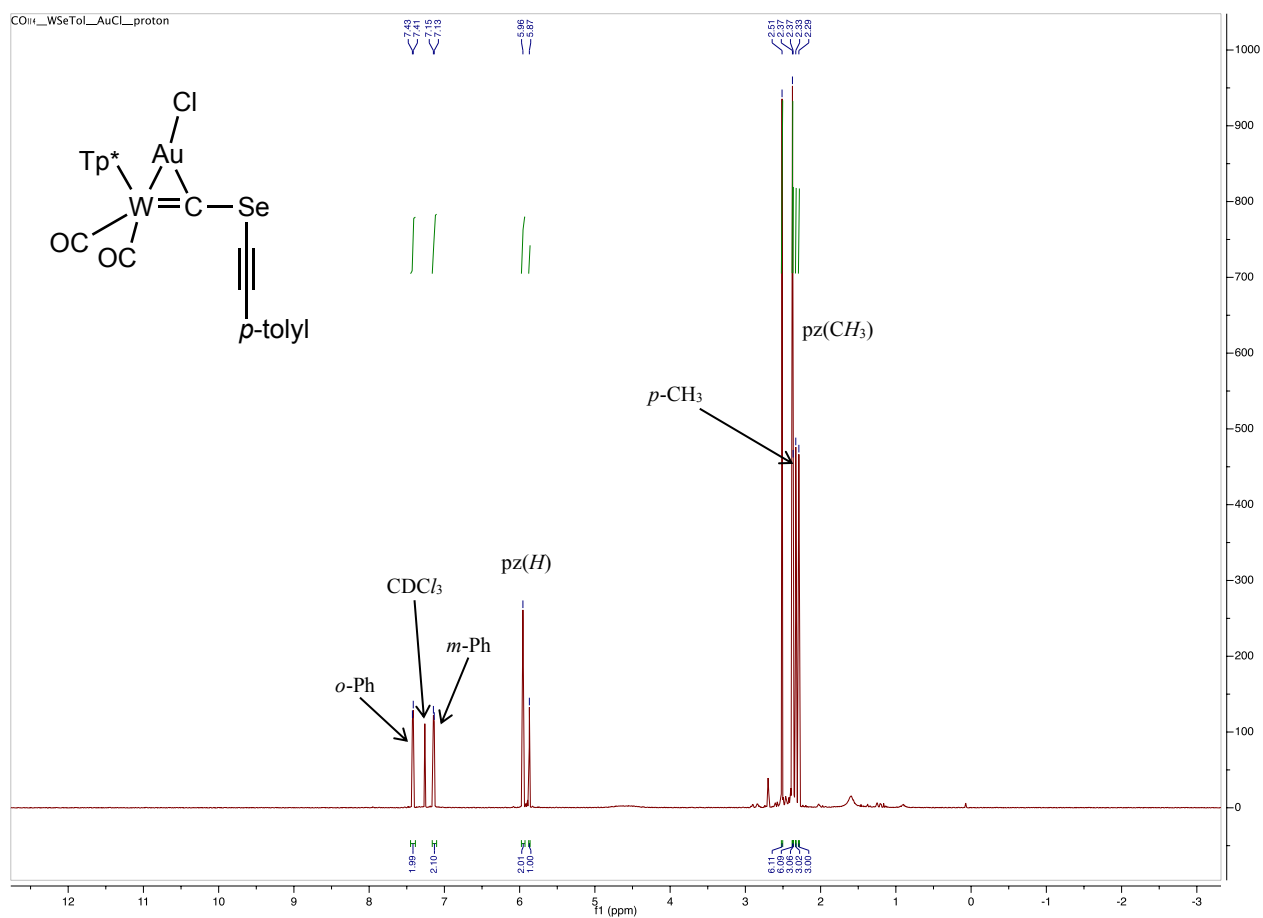

$^1\text{H}$  NMR SPECTRUM ( $700\text{ MHz}$ ,  $\text{CDCl}_3$ ,  $25^\circ\text{C}$ ,  $\delta$ ) of  $[\text{WAuCl}(\mu\text{-CSeC}\equiv\text{Cp-tol})(\text{CO})_2(\text{Tp}^*)]$  (**3d**).

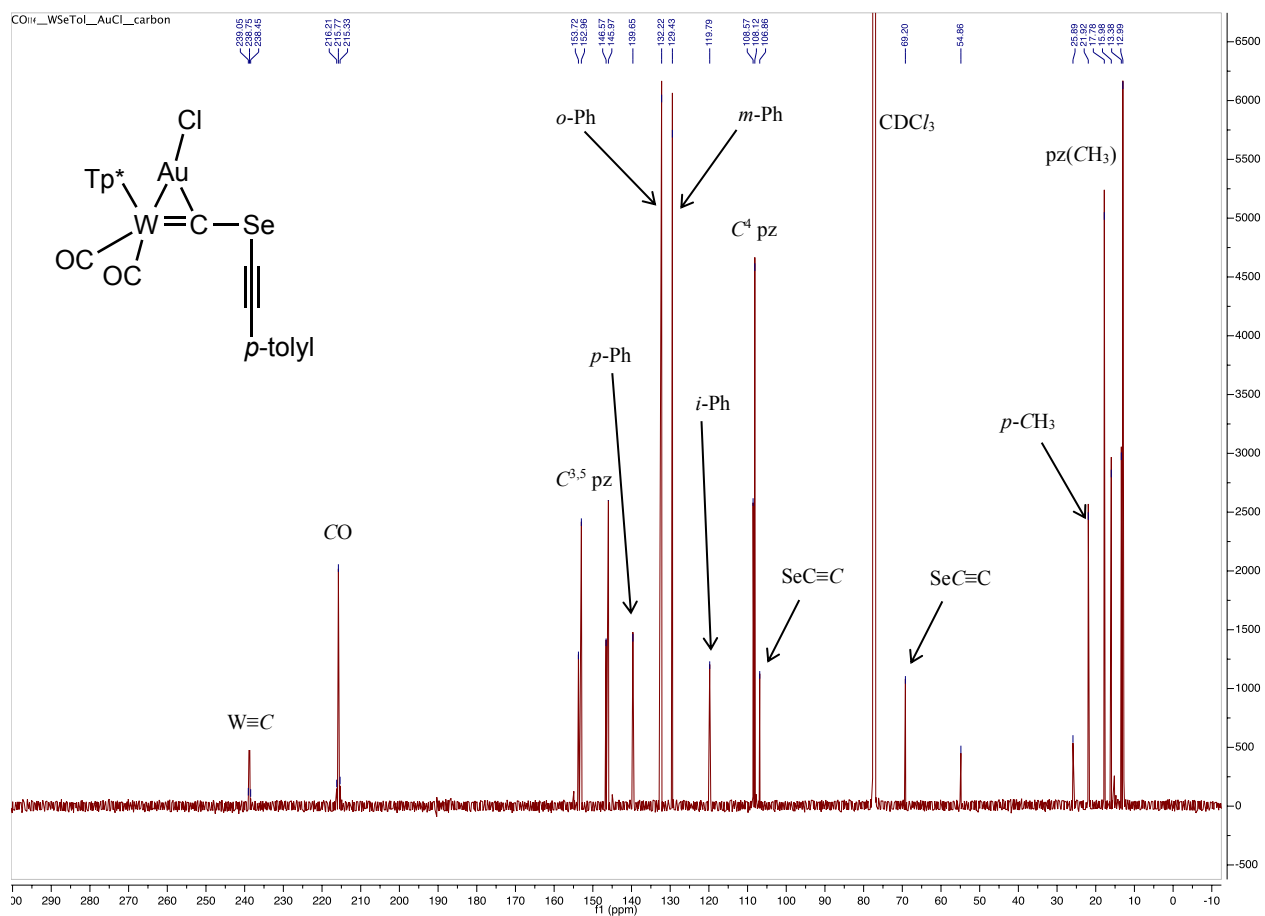

$^{13}\text{C}\{^1\text{H}\}$  NMR SPECTRUM (176 MHz,  $\text{CDCl}_3$ , 25°C,  $\delta$ ) of  $[\text{WAuCl}(\mu\text{-CSeC}\equiv\text{Cp-tol})(\text{CO})_2(\text{Tp}^*)]$  (**3d**).

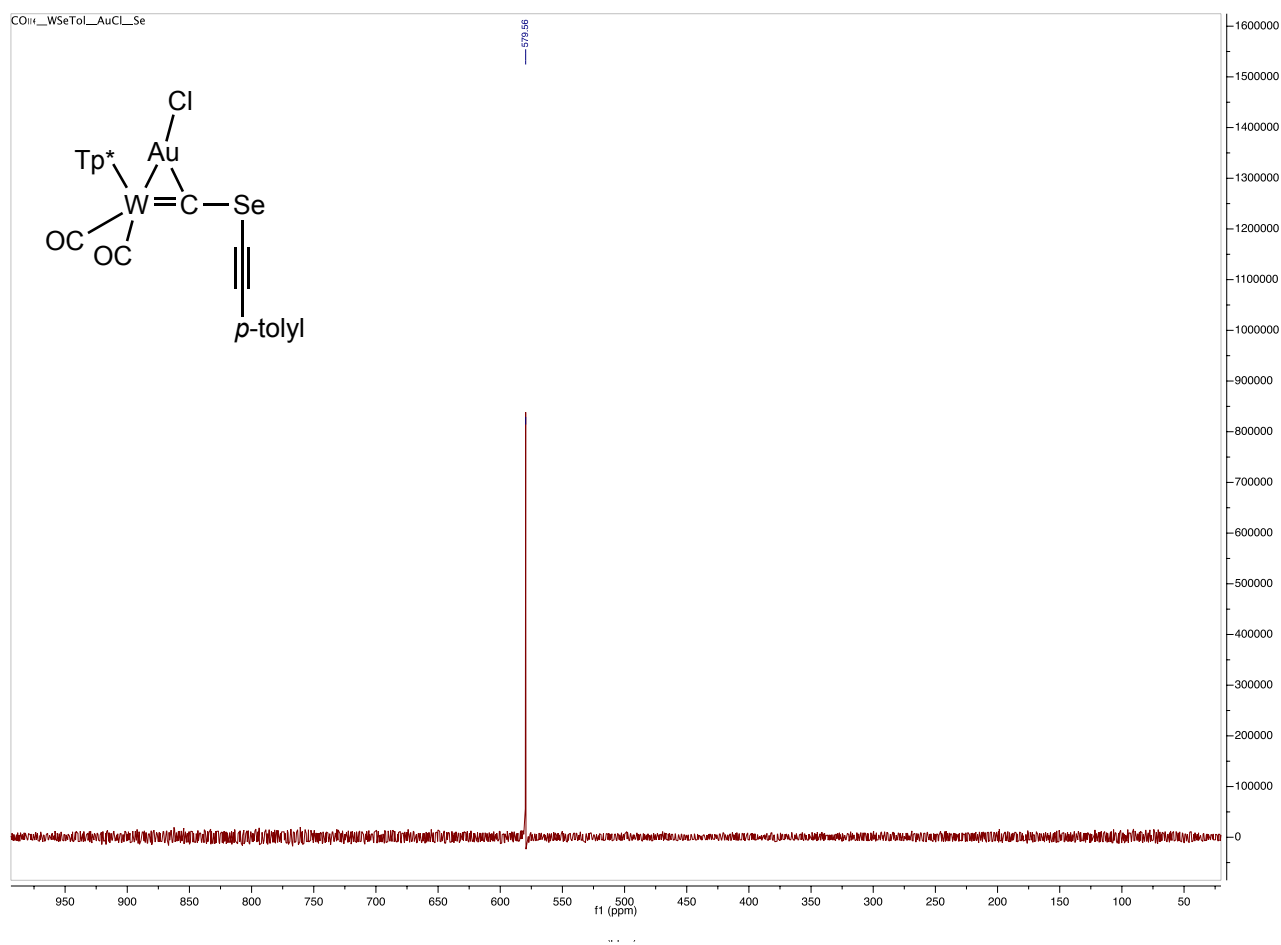

$^{77}\text{Se}\{^1\text{H}\}$  NMR SPECTRUM (76 MHz,  $\text{CDCl}_3$ ,  $25^\circ\text{C}$ ,  $\delta$ ) of  $[\text{WAuCl}(\mu\text{-CSeC}\equiv\text{Cp-tol})(\text{CO})_2(\text{Tp}^*)]$  (**3d**).

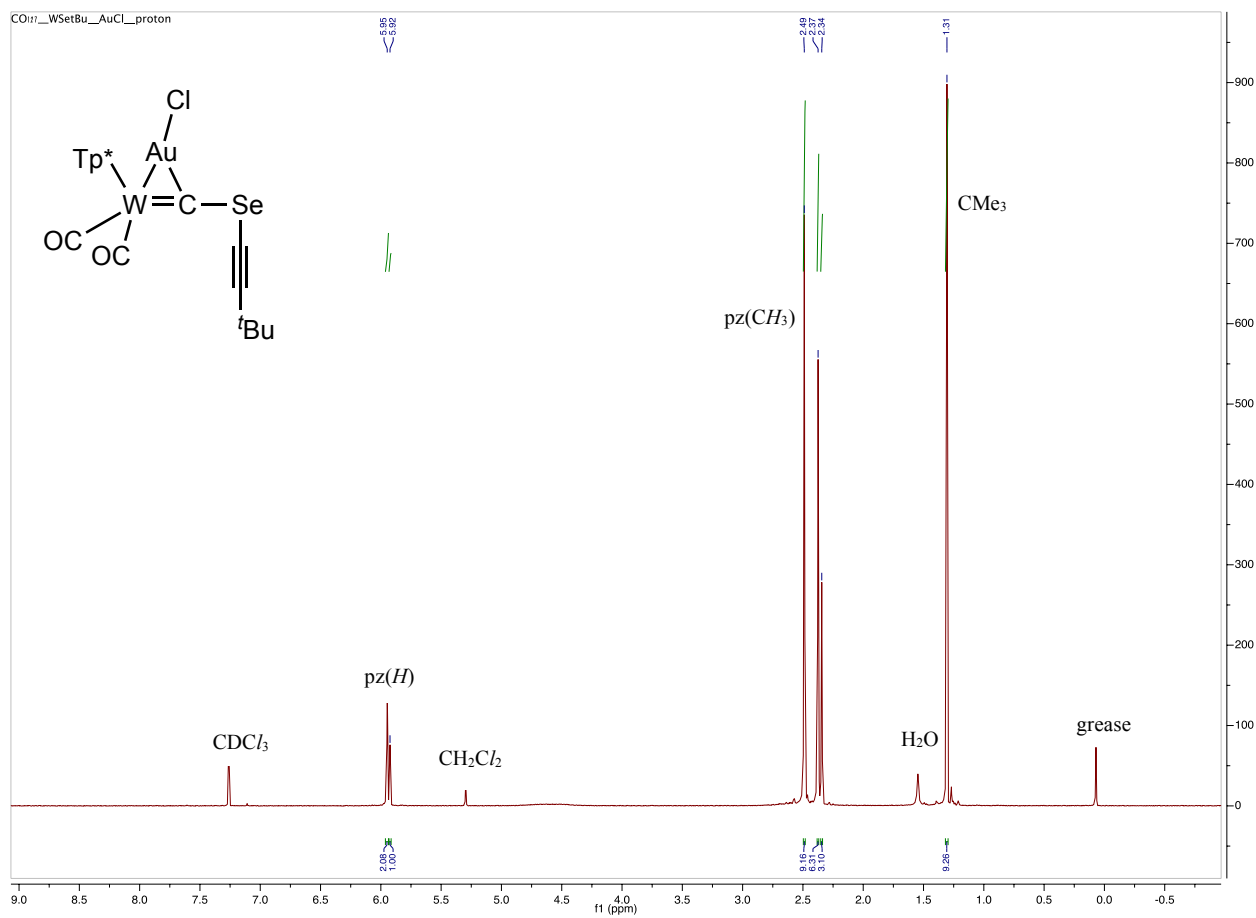

$^1\text{H}$  NMR SPECTRUM ( $700\text{ MHz}$ ,  $\text{CDCl}_3$ ,  $25^\circ\text{C}$ ,  $\delta$ ) of  $[\text{WAuCl}(\mu\text{-CSeC}\equiv\text{C}^t\text{Bu})(\text{CO})_2(\text{Tp}^*)]$  (**3e**).

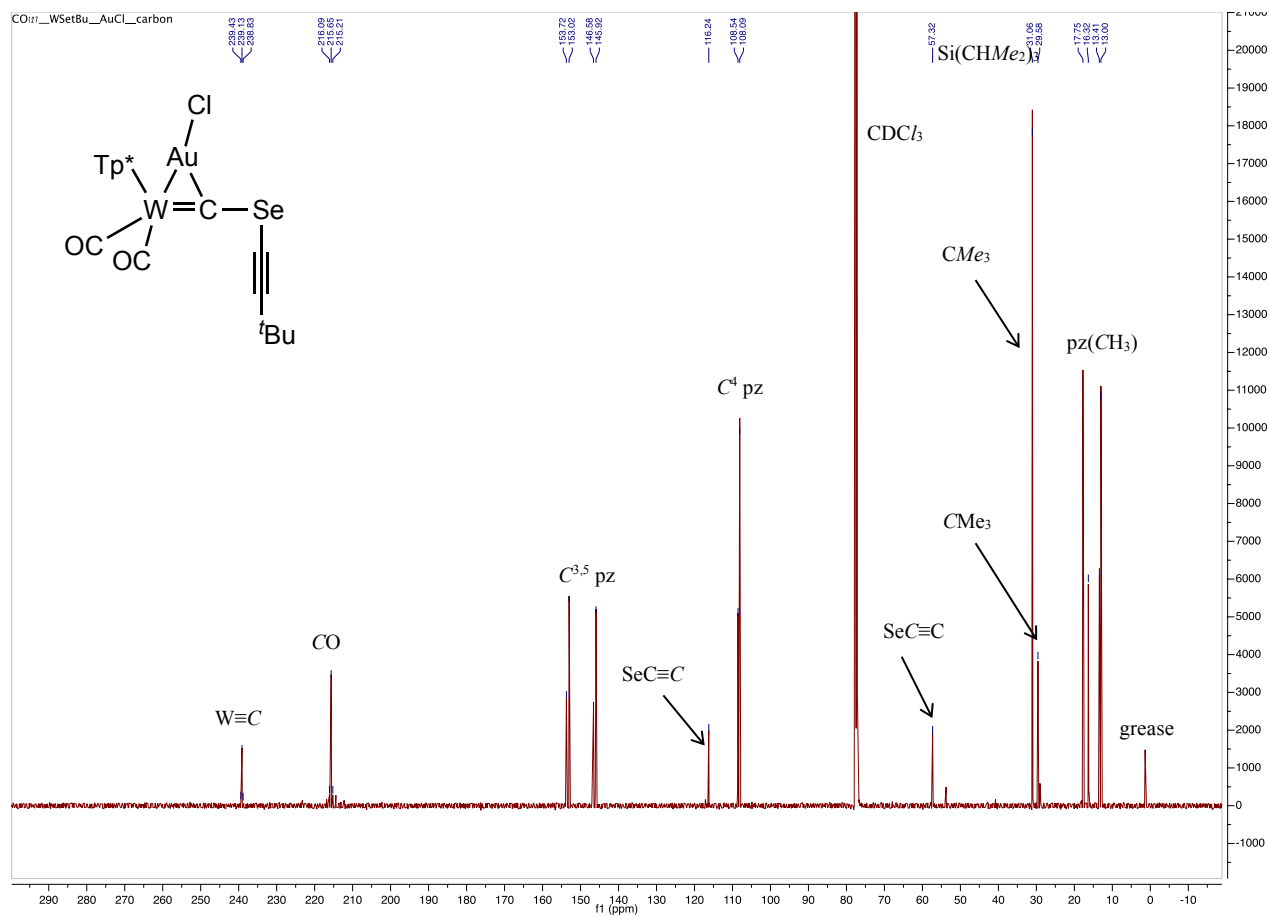

$^{13}C\{^1H\}$  NMR SPECTRUM (176 MHz,  $CDCl_3$ , 25°C,  $\delta$ ) of  $[WAuCl(\mu-CSeC\equiv tBu)(CO)_2(Tp^*)]$  (3e).

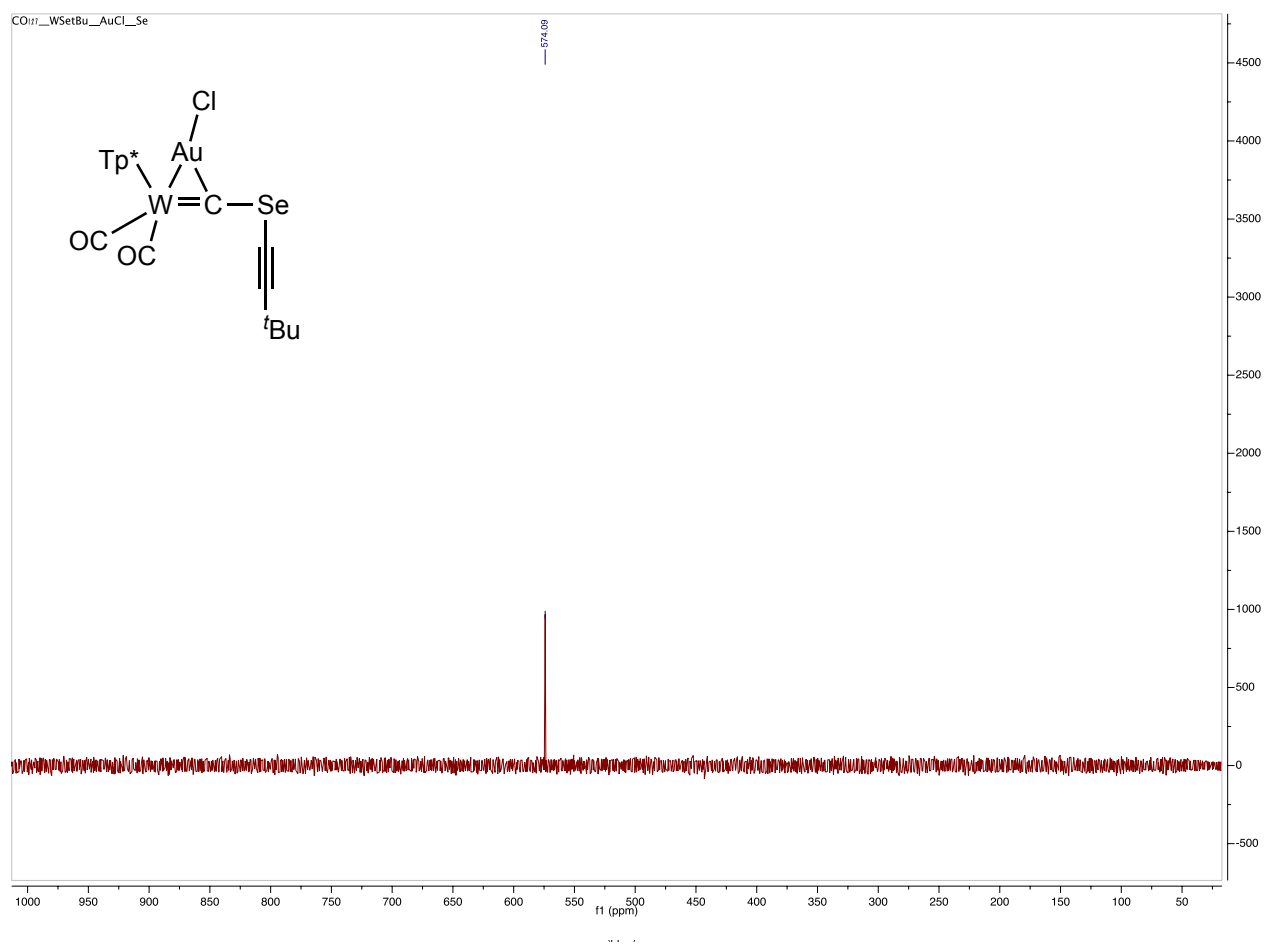

$^{77}\text{Se}\{^1\text{H}\}$  NMR SPECTRUM (76 MHz,  $\text{CDCl}_3$ ,  $25^\circ\text{C}$ ,  $\delta$ ) of  $[\text{WAuCl}(\mu\text{-CSeC}\equiv\text{C}^t\text{Bu})(\text{CO})_2(\text{Tp}^*)]$  (**3e**).



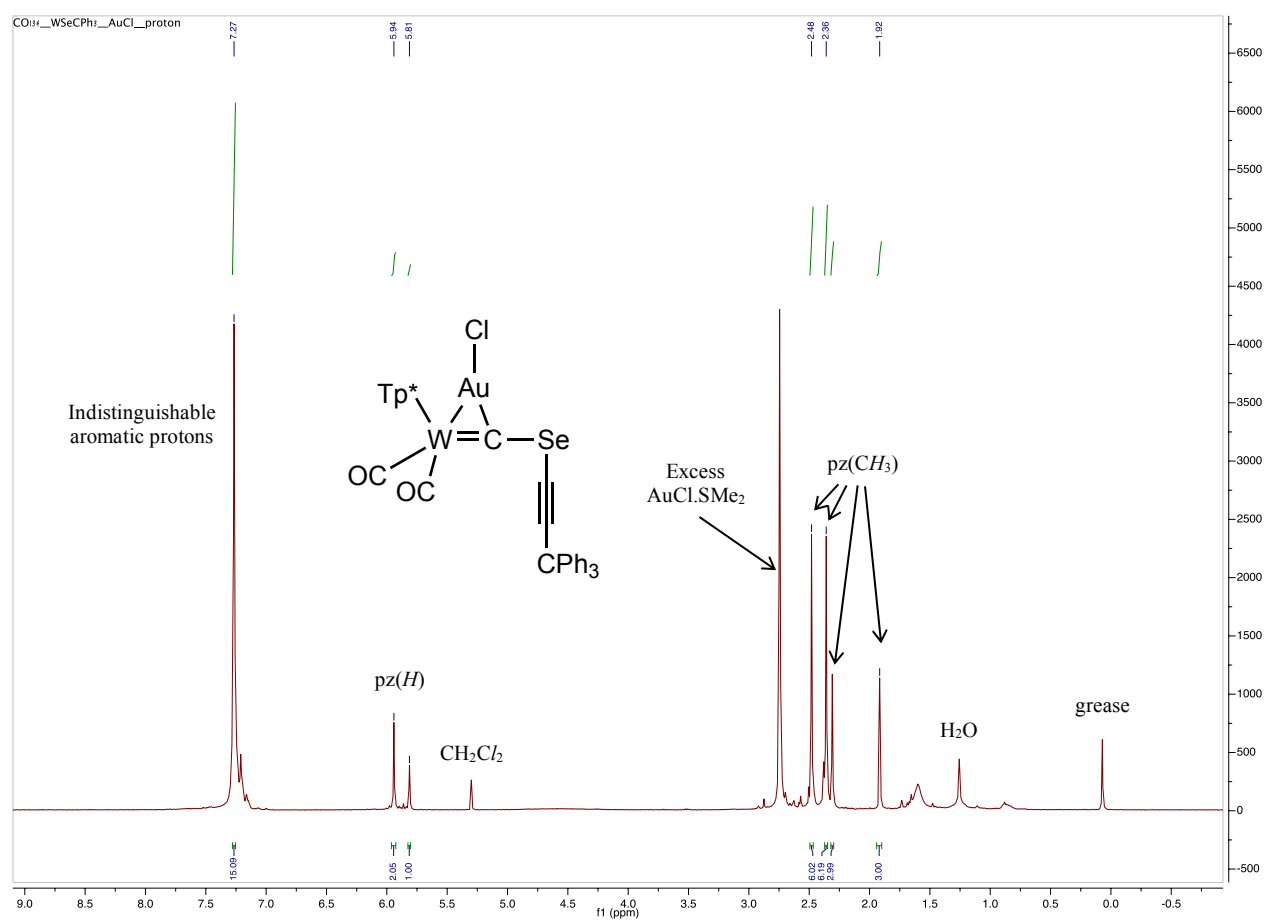

$^1\text{H}$  NMR SPECTRUM (400 MHz,  $\text{CDCl}_3$ , 25°C,  $\delta$ ) of  $[\text{WAuCl}(\mu\text{-CSeC}\equiv\text{CPh}_3)(\text{CO})_2(\text{Tp}^*)]$  (**3f**).

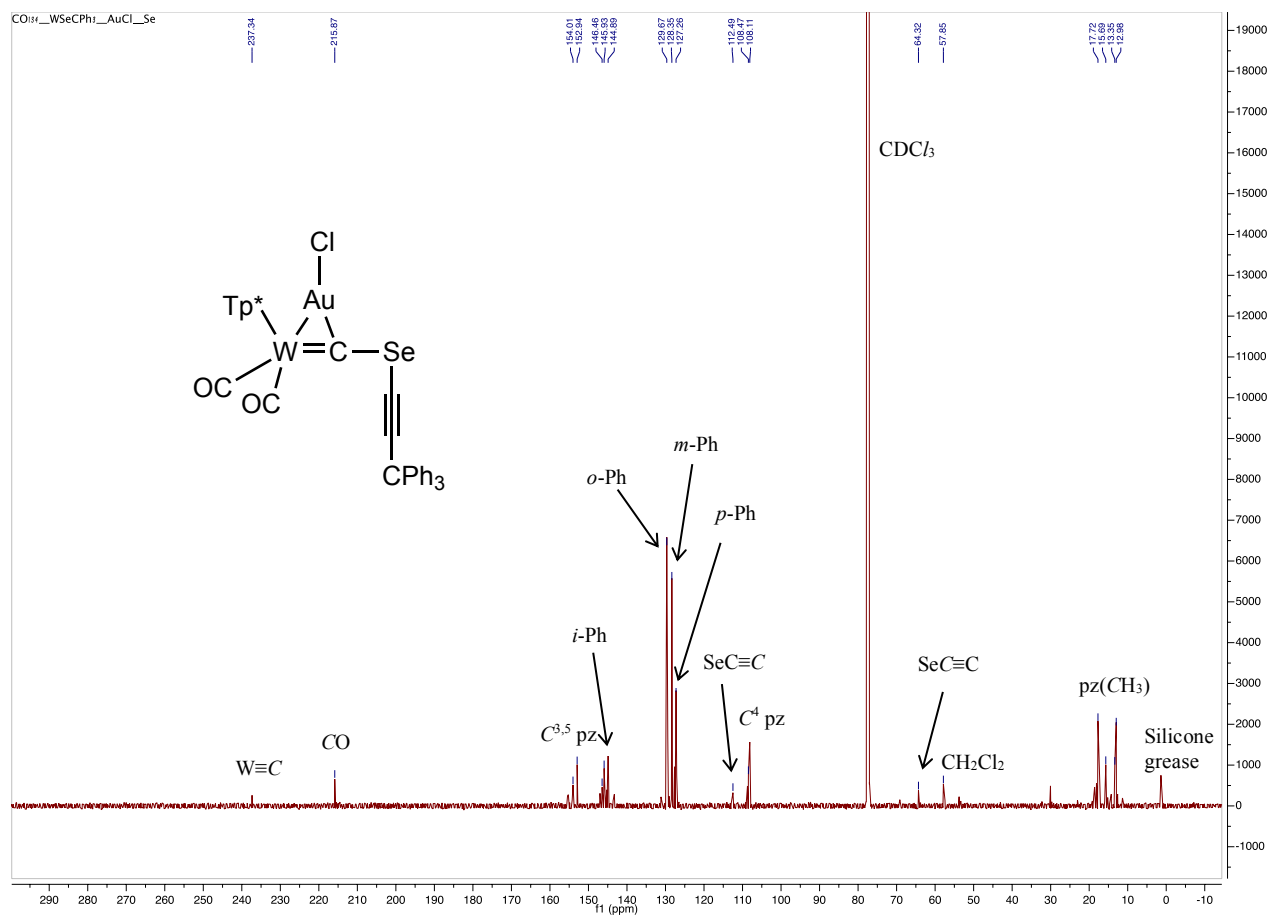

$^{13}\text{C}\{^1\text{H}\}$  NMR SPECTRUM (176 MHz,  $\text{CDCl}_3$ ,  $25^\circ\text{C}$ ,  $\delta$ ) of  $[\text{WAuCl}(\mu\text{-CSeC}\equiv\text{CCPh}_3)(\text{CO})_2(\text{Tp}^*)]$  (**3f**).

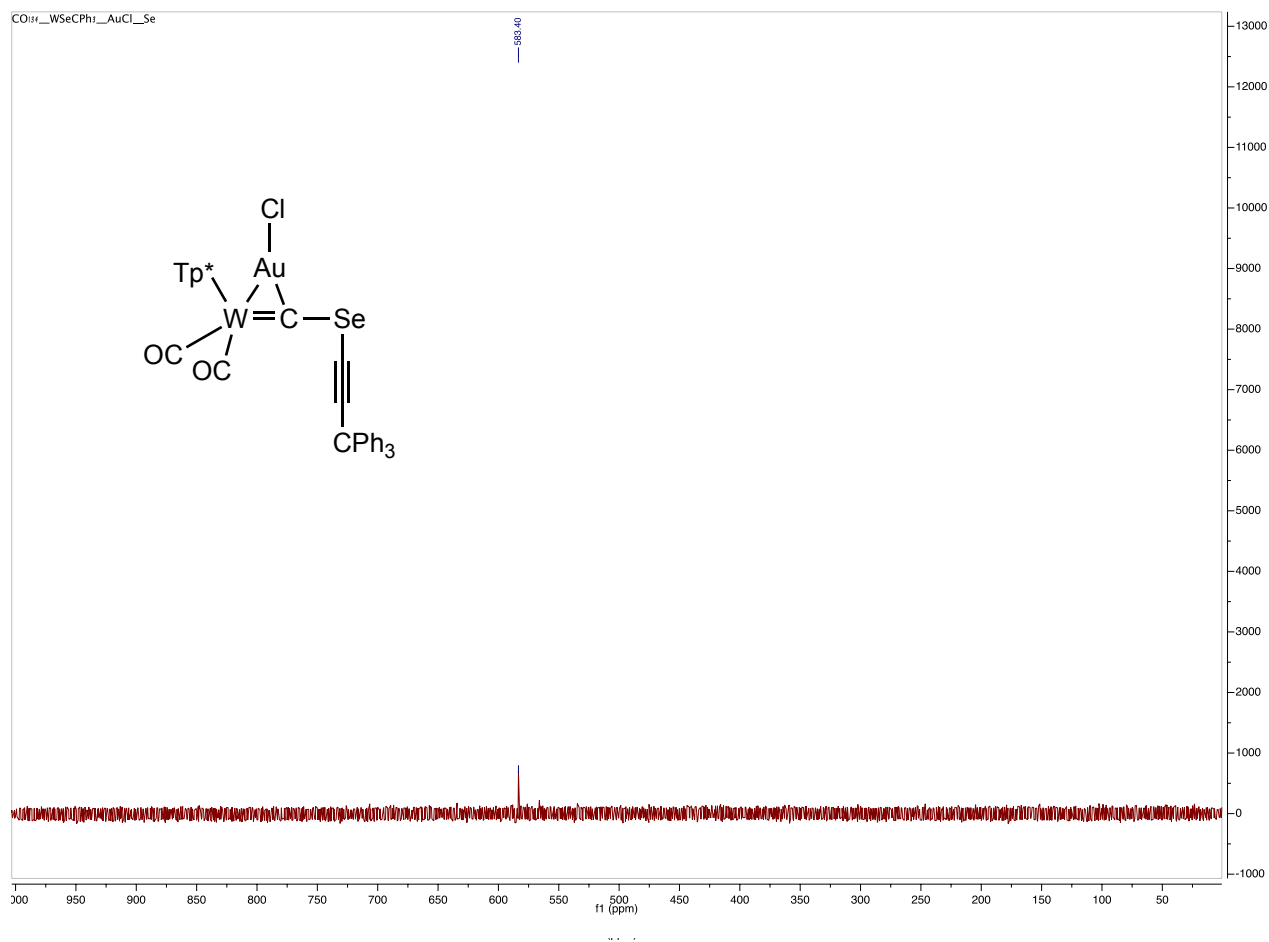

$^{77}\text{Se}\{^1\text{H}\}$  NMR SPECTRUM (134 MHz,  $\text{CDCl}_3$ ,  $25^\circ\text{C}$ ,  $\delta$ ) of  $[\text{WAuCl}(\mu\text{-CSeC}\equiv\text{CPh}_3)(\text{CO})_2(\text{Tp}^*)]$  (**3f**).

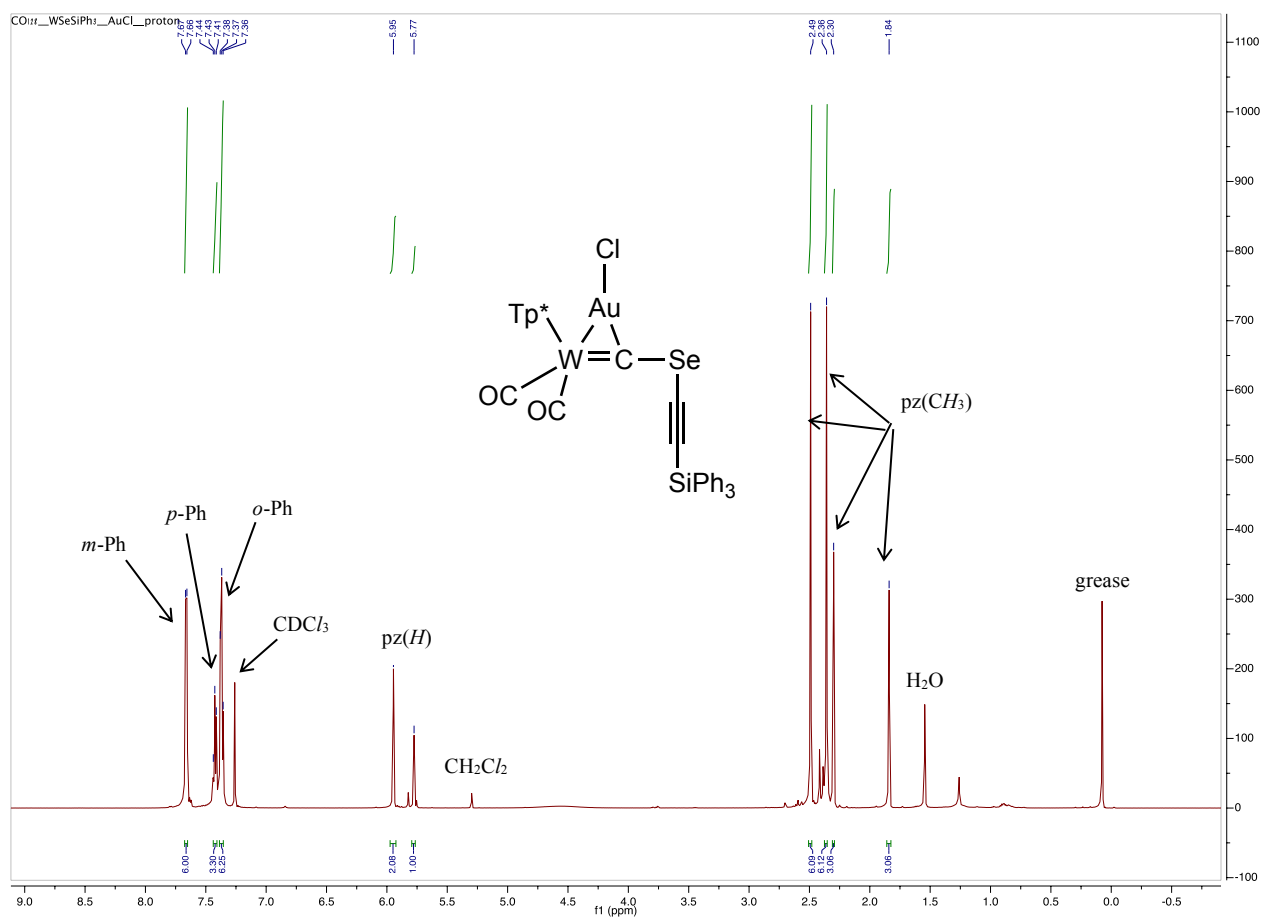

$^1\text{H}$  NMR SPECTRUM (400 MHz,  $\text{CDCl}_3$ , 25°C,  $\delta$ ) of  $[\text{WAuCl}(\mu\text{-CSeC}\equiv\text{CSiPh}_3)(\text{CO})_2(\text{Tp}^*)]$  (**3g**).

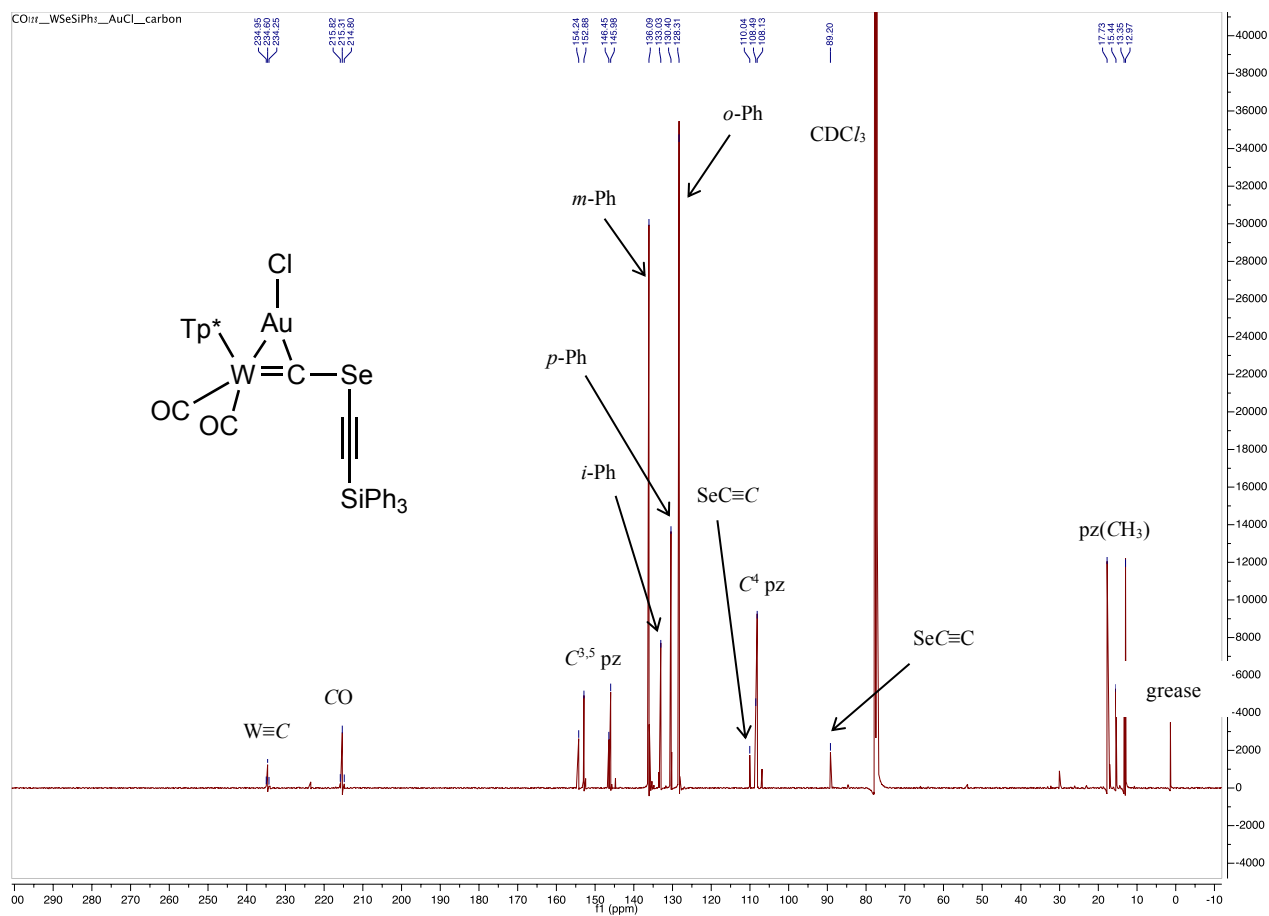

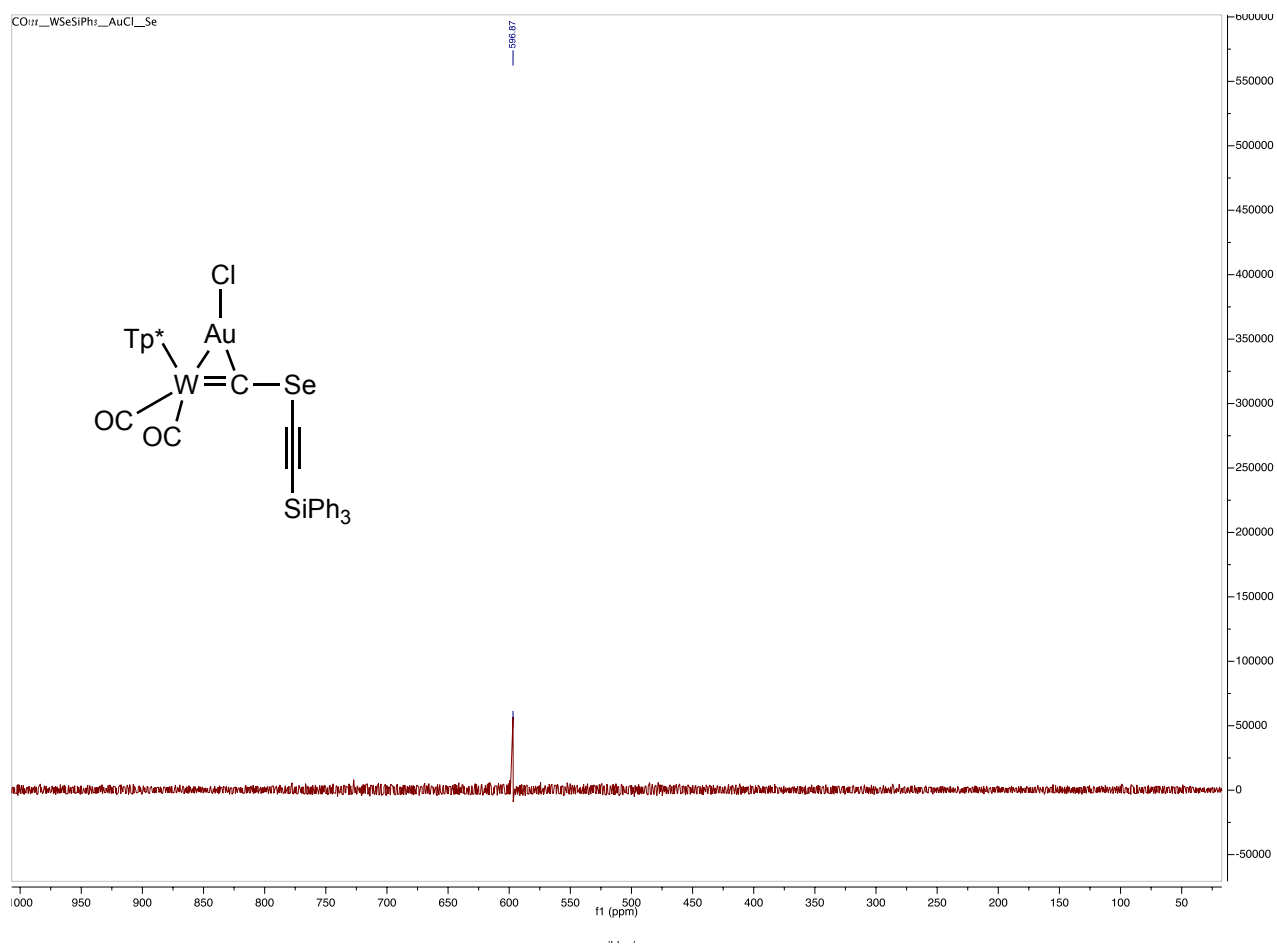

$^{77}\text{Se}\{^1\text{H}\}$  NMR SPECTRUM (134 MHz,  $\text{CDCl}_3$ ,  $25^\circ\text{C}$ ,  $\delta$ ) of  $[\text{WAuCl}(\mu\text{-CSeC}\equiv\text{CSiPh}_3)(\text{CO})_2(\text{Tp}^*)]$  (**3g**).

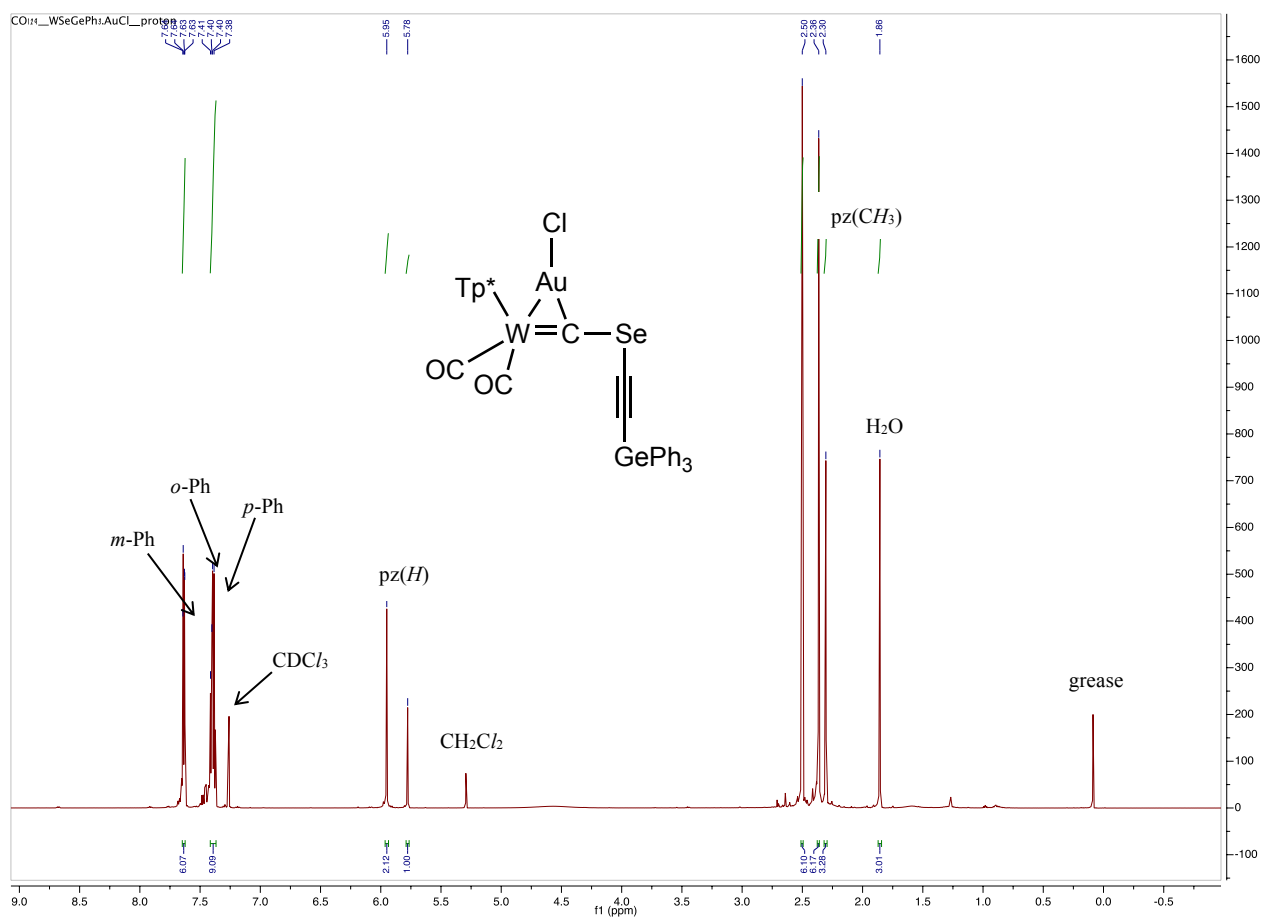

$^1\text{H}$  NMR SPECTRUM (600 MHz,  $\text{CDCl}_3$ , 25°C,  $\delta$ ) of  $[\text{WAuCl}(\mu\text{-CSeC}\equiv\text{CGePh}_3)(\text{CO})_2(\text{Tp}^*)]$  (**3h**).

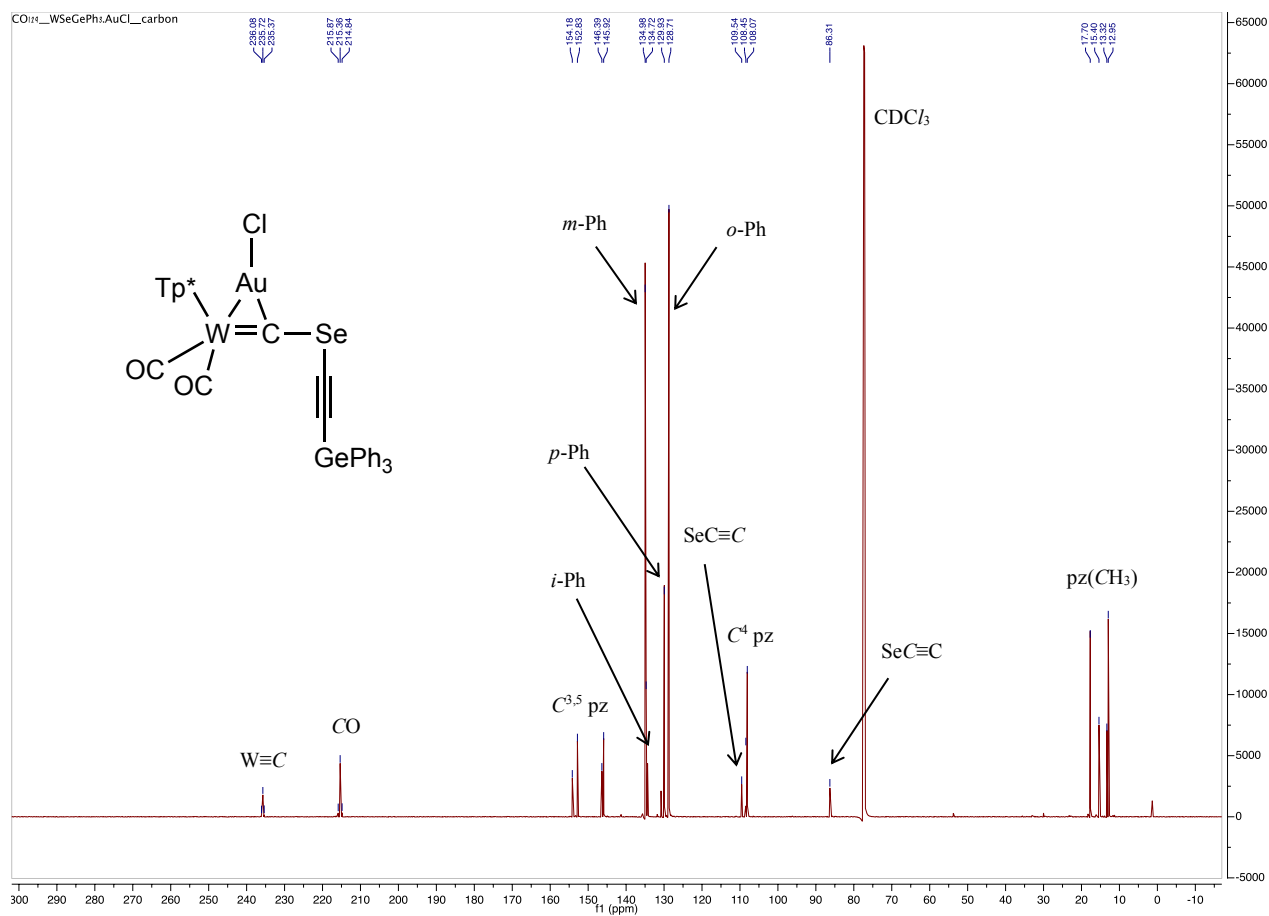

$^{13}\text{C}\{^1\text{H}\}$  NMR SPECTRUM (151 MHz,  $\text{CDCl}_3$ , 25°C,  $\delta$ ) of  $[\text{WAuCl}(\mu\text{-CSeC}\equiv\text{CGePh}_3)(\text{CO})_2(\text{Tp}^*)]$  (**3h**).



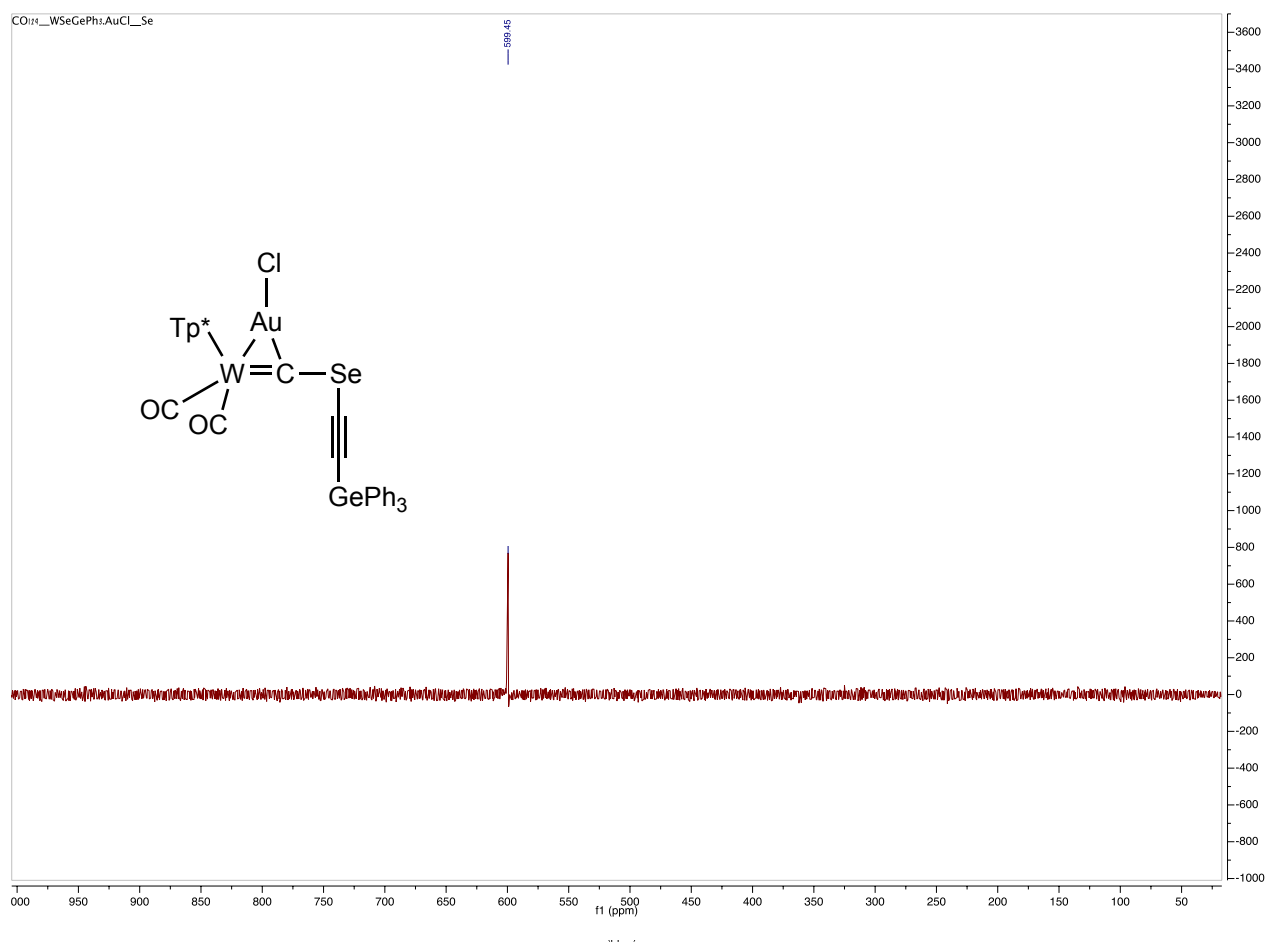

$^{77}\text{Se}\{^1\text{H}\}$  NMR SPECTRUM (134 MHz,  $\text{CDCl}_3$ ,  $25^\circ\text{C}$ ,  $\delta$ ) of  $[\text{WAuCl}(\mu\text{-CSeC}\equiv\text{CGePh}_3)(\text{CO})_2(\text{Tp}^*)]$  (**3h**).

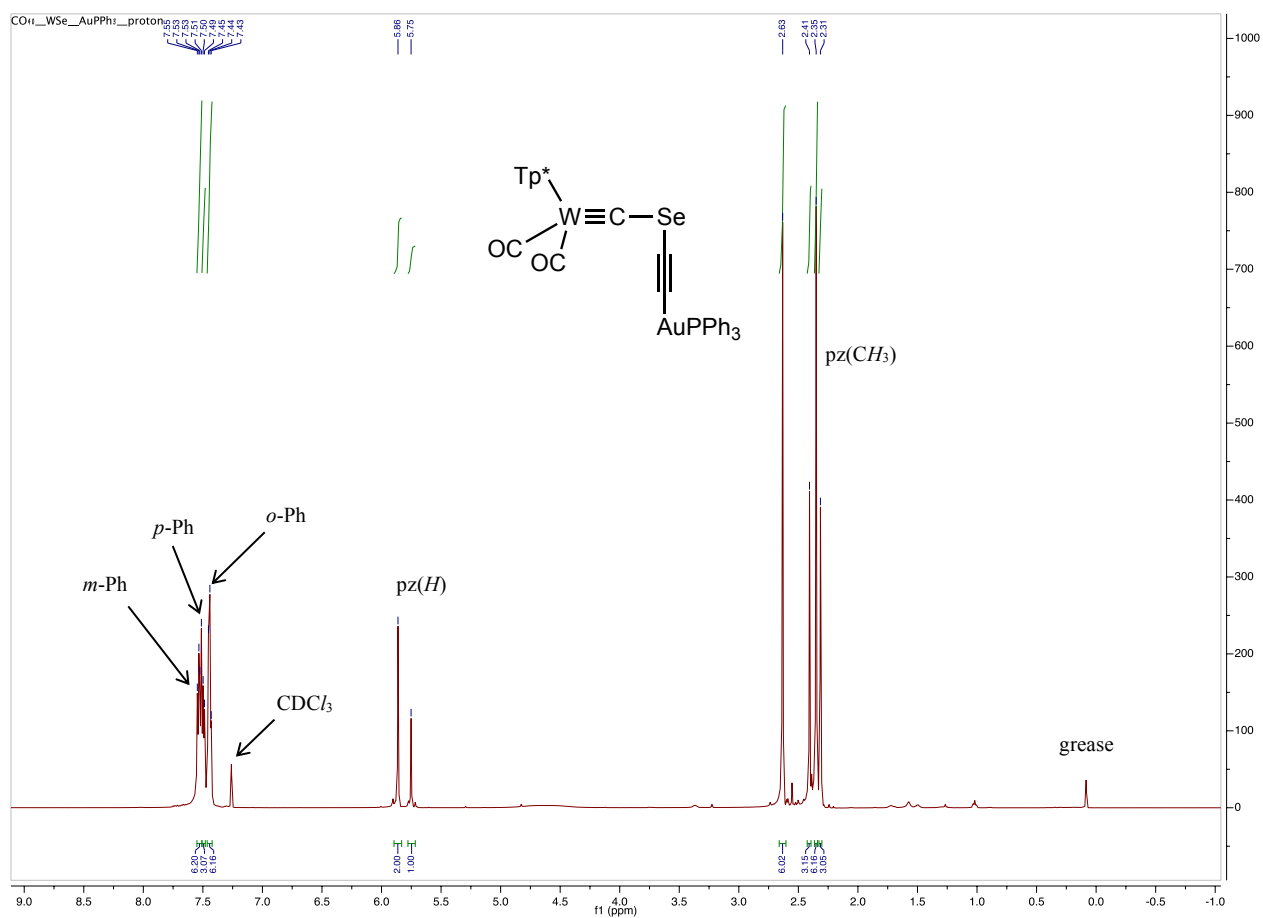

$^1\text{H}$  NMR SPECTRUM ( $600\text{ MHz}$ ,  $\text{CDCl}_3$ ,  $25^\circ\text{C}$ ,  $\delta$ ) of  $[\text{W}(\equiv\text{CSeC}\equiv\text{CAuPPh}_3)(\text{CO})_2(\text{Tp}^*)]$  (**4a**).

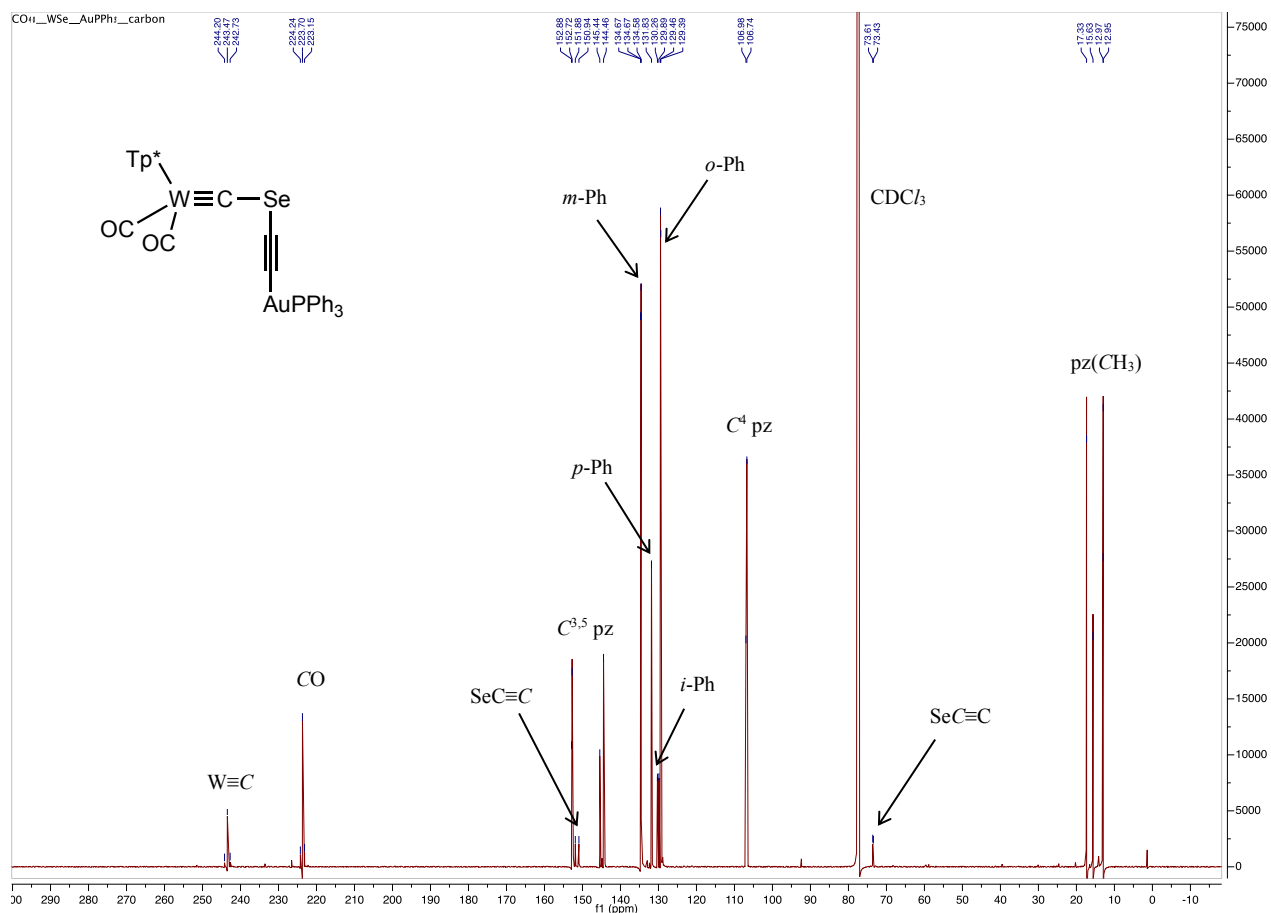

$^{13}\text{C}\{^1\text{H}\}$  NMR SPECTRUM (151 MHz,  $\text{CDCl}_3$ , 25°C,  $\delta$ ) of  $[\text{W}(\equiv\text{CSeC}\equiv\text{CAuPPh}_3)(\text{CO})_2(\text{Tp}^*)]$  (**4a**).

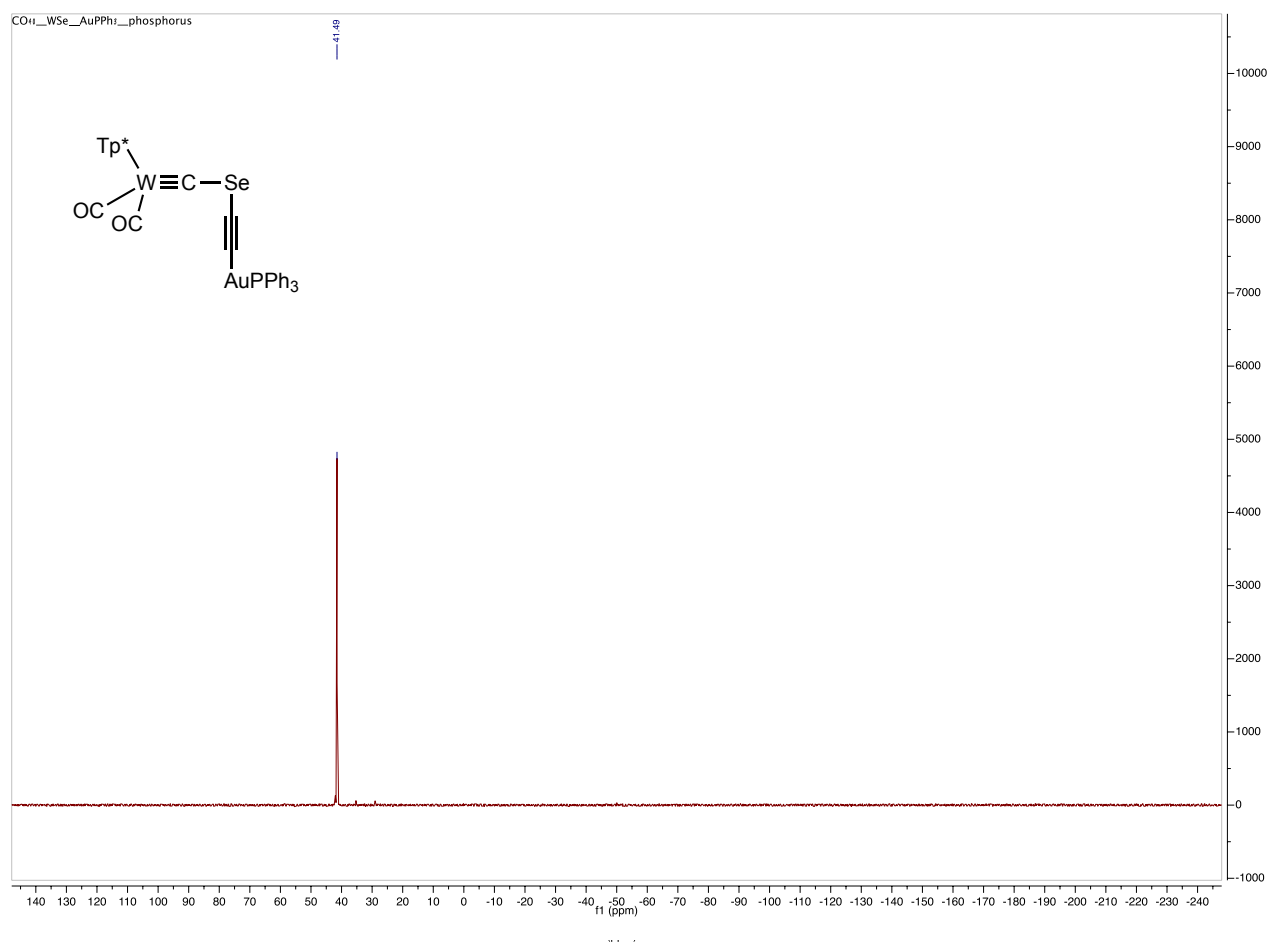

$^{31}P\{^1H\}$  NMR SPECTRUM (162 MHz,  $C_6D_6$ , 25 °C,  $\delta$ ) of  $[W(=CSeC\equiv CAuPPh_3)(CO)_2(Tp^*)]$  (**4a**).

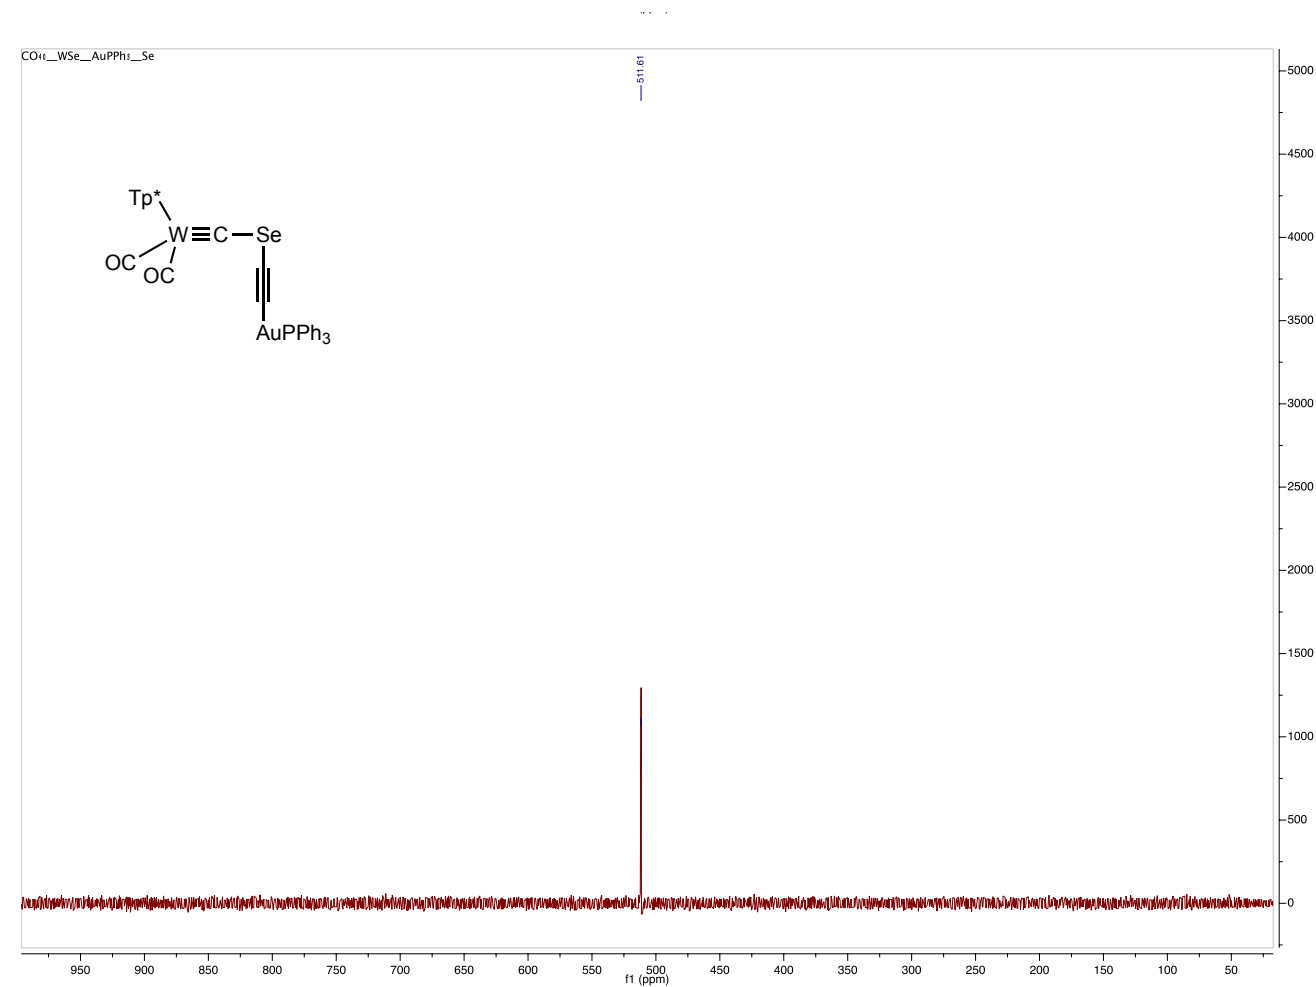

$^{77}\text{Se}\{^1\text{H}\}$  NMR SPECTRUM (76 MHz,  $\text{CDCl}_3$ , 25 °C,  $\delta$ ) of  $[\text{W}(\equiv\text{CSeC}\equiv\text{CAuPPh}_3)(\text{CO})_2(\text{Tp}^*)]$  (**4a**).

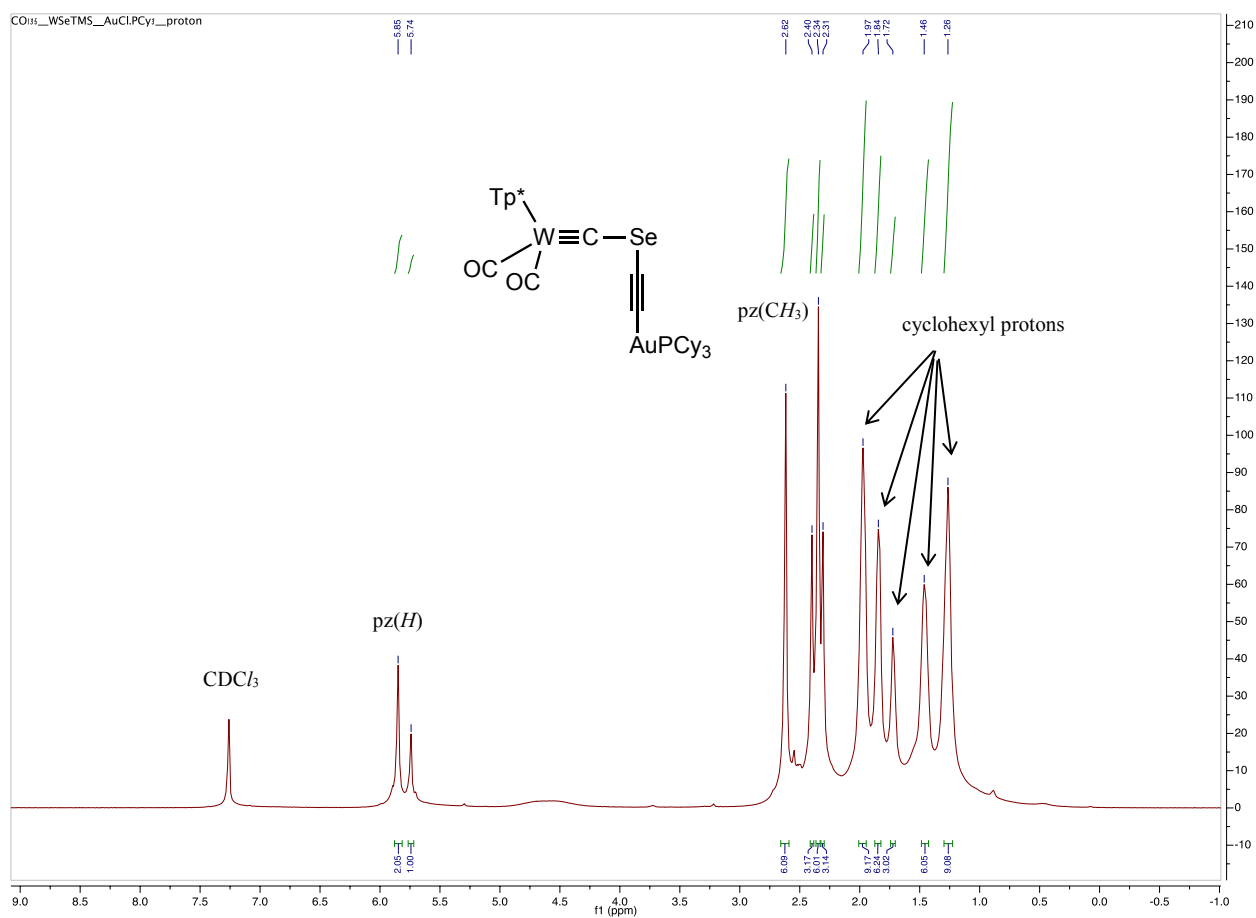

$^1\text{H}$  NMR SPECTRUM (600 MHz,  $\text{CDCl}_3$ , 25°C,  $\delta$ ) of  $[\text{W}(=\text{CSeC}\equiv\text{CAuPCy}_3)(\text{CO})_2(\text{Tp}^*)]$  (**4b**).

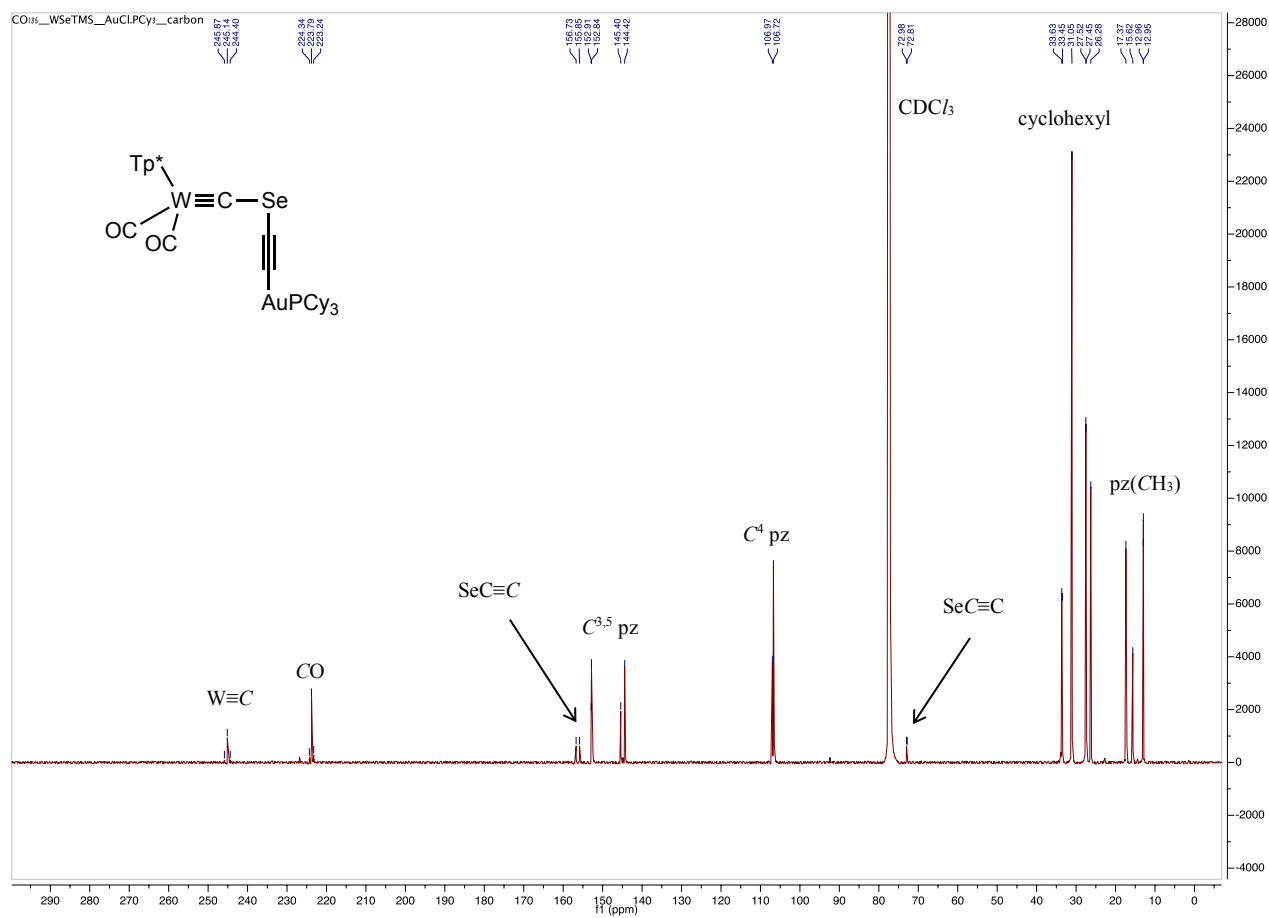

$^{13}\text{C}\{^1\text{H}\}$  NMR SPECTRUM (151 MHz,  $\text{CDCl}_3$ , 25 °C,  $\delta$ ) of  $[\text{W}(\equiv\text{CSeC}\equiv\text{CAuPCy}_3)(\text{CO})_2(\text{Tp}^*)]$  (4b).

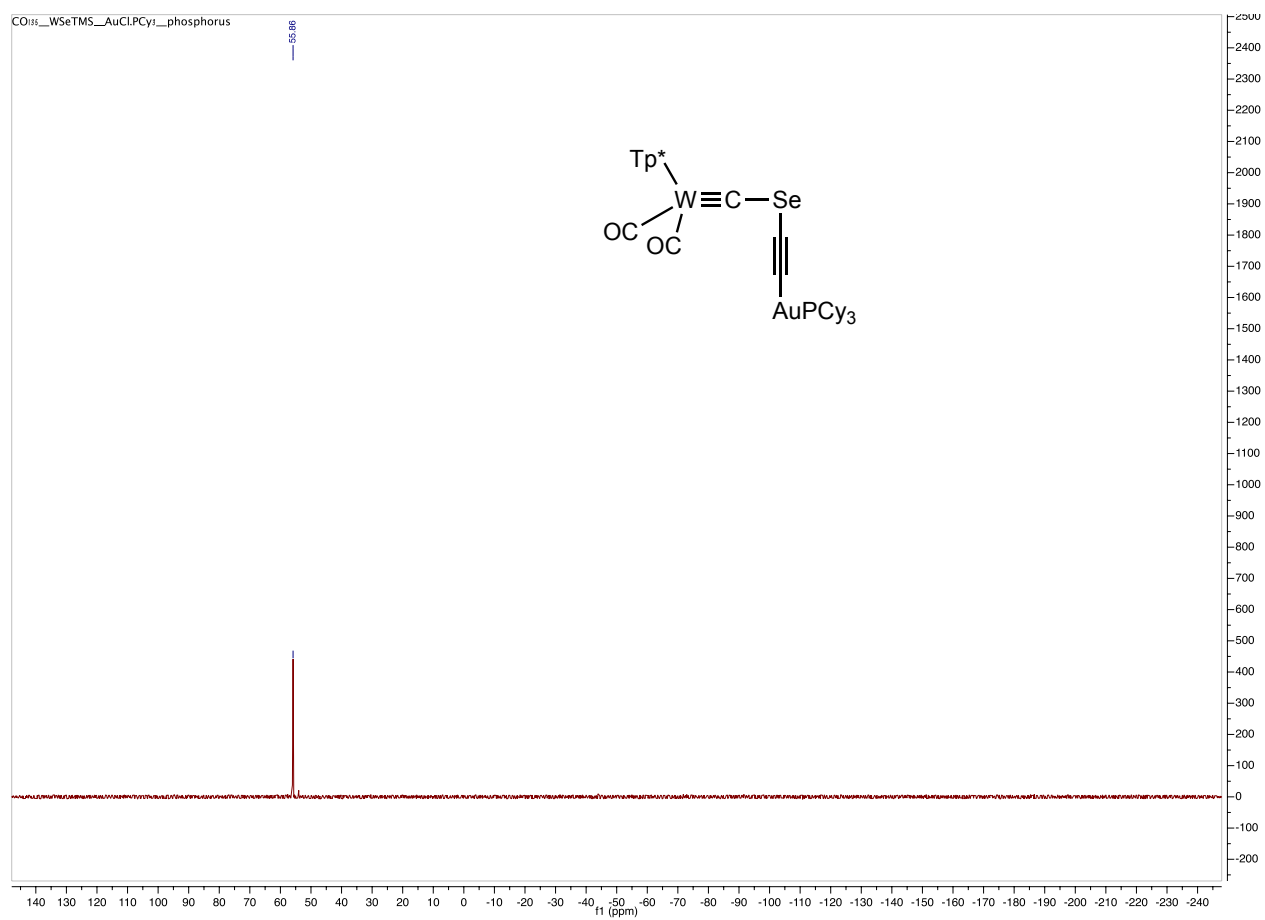

$^{31}P\{^1H\}$  NMR SPECTRUM (162 MHz,  $C_6D_6$ , 25 °C,  $\delta$ ) of  $[W(\equiv CSeC\equiv CAuPCy_3)(CO)_2(Tp^*)]$  (4b).



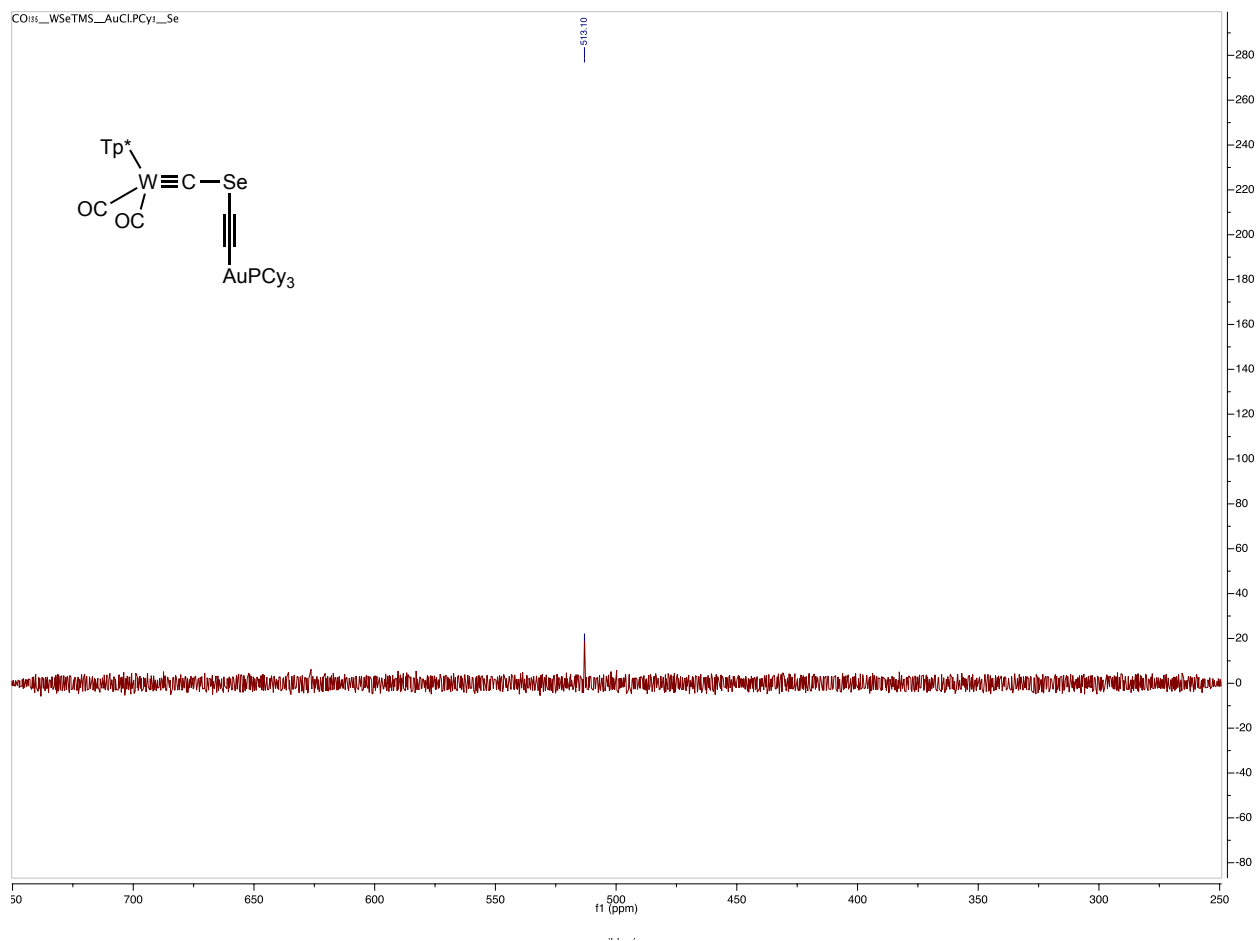

$^{77}\text{Se}\{^1\text{H}\}$  NMR SPECTRUM (76 MHz,  $\text{CDCl}_3$ ,  $25^\circ\text{C}$ ,  $\delta$ ) of  $[\text{W}(\equiv\text{CSeC}\equiv\text{CAuPCy}_3)(\text{CO})_2(\text{Tp}^*)]$  (**4b**).

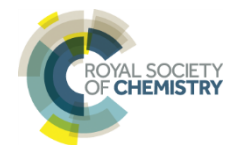

## Dalton Transactions

ARTICLE
